# Supplementary material
Source: publisher site journal article supplement (https://www.dovepress.com/article/361700)
Supplement: Supplementary file 1 [file get_supplementary_file.php]

# Supplementary materials

# 1 Impact map and breakdown of investment and return

## Investment

The following tables show the investment for each proposal in detail.

**Table 1. Investment breakdown of Proposal 1. To ensure spirometry availability in primary care, and to provide training on its use and interpretation.**

| **Stakeholders** | **Investment description** | **Investment breakdown** | |
| --- | --- | --- | --- |
| **National Health Service** | Economic resources | Number of health centers in the National Health Service (NHS) [1]. | 3,055 |
| Number of clinics [1]. | 10,067 |
| Percentage of primary care (PC) centers that do not have a spirometer [2]. | 15.40% |
| Cost of portable spirometer compliant with European Respiratory Society regulations [3]. | €249.95 |
| **Total (€)** | **€505,095.96** |
| **Pulmonologists and PC professionals with experience in COPD** | Working time spent on training outside of working hours. | Number of healthcare centers in the NHS[1]. | 3,055 |
| Number of clinics [1]. | 10,067 |
| Number of PC nurses per health center or clinic who would receive training in performing and interpreting spirometry [4]. | 2 |
| Number of health professionals for each theoretical-practical training course in performing and interpreting spirometry [4]. | 15 |
| Percentage of PC personnel trained in performing and interpreting spirometry [5]. | 67.40% |
| Number of hours of theoretical-practical training in performing and interpreting spirometry [6]. | 8 |
| Rate per hour of face-to-face training [7]. | €125.00 |
| Number of hours of supervised performance and interpretation of spirometry during training sessions [6]. | 4 |
| Hourly rate for online tutoring [7]. | €30.00 |
| **Total (€)** | **€638,813.95** |
| **PROPOSAL 1 TOTAL INVESTMENT** | | | **€1,143,909.91** |

**Table 2. Breakdown of the investment of Proposal 2. To provide training on COPD for primary care professionals.**

| **Stakeholders** | **Investment description** | **Investment breakdown** | |
| --- | --- | --- | --- |
| **National Health Service** | Economic resources. | Cost of a first application for the accreditation of a face-to-face course [8]. | €102.01 |
| Number of General Practitioners (GP) [9]. | 35,190 |
| Maximum number of participants per training session for GP [4]. | 20 |
| Cost of successive editions for the accreditation of a face-to-face course [8]. | €30.60 |
| Number of experts needed to prepare a guideline for PC professionals’ training [4]. | 6 |
| Fees per expert for the creation and validation of a guideline for PC professionals’ training [3]. | €1,800.00 |
| Cost of designing a guideline for PC professionals’ training [3]. | €4,000.00 |
| Printing cost for each PC professional training guideline [3]. | €8.00 |
| Cost of SEPAR's scientific endorsement [10]. | €9,000.00 |
| Cost of the scientific endorsement of four scientific societies linked to PC [4,11]. | €12,000.00 |
| **Total (€)** | **€371,232.11** |
| **Pulmonologists or PC professionals with experience in COPD** | Working time spent on training outside of working hours. | Number of GP [9]. | 35,190 |
| Maximum number of participants per training session for GP [4]. | 20 |
| Number of hours of each training course for GP [4]. | 4 |
| Rate per hour of face-to-face training [7]. | €125.00 |
| Number of experts needed to prepare a guideline for PC professionals’ training [4]. | 2 |
| **Total (€)** | **€1,759,500.00** |
| **PROPOSAL 2 TOTAL INVESTMENT** | | | **€2,130,732.11** |

**Table 3. Breakdown of the investment of Proposal 3. To inform patients and families about the disease and its treatments.**

| **Stakeholders** | **Investment description** | **Investment breakdown** | |
| --- | --- | --- | --- |
| **National Health Service** | Economic resources. | Expert fees for the creation and content validation of an information brochure on COPD [3]. | €1,200.00 |
| Number of experts required to produce an information brochure [4]. | 8 |
| Informational brochure design cost [3]. | €2,000.00 |
| Cost of SEPAR's scientific endorsement [10]. | €9,000.00 |
| Cost of the scientific endorsement of four scientific societies linked to PC [4,11]. | €12,000.00 |
| Total number of COPD patients [12,13]. | 3,192,001 |
| Percentage of patients with mild COPD [14]. | 56.40% |
| Printing cost for each information brochure [3]. | €1.50 |
| Postage cost of a package [3]. | €8.00 |
| Number of NHS hospitals with pulmonology services [15]. | 276 |
| Number of NHS health centers [1]. | 3,055 |
| Number of clinics [1]. | 10,067 |
| **Total (€)** | **€2,840,216.85** |
| **PC Nurses** | Working time. | Number of COPD patients followed up in PC [16]. | 863,583 |
| Cost of visit to PC nurse [17]. | €25.97 |
| **Total (€)** | **€22,427,250.51** |
| **PC Nurses** | Working time. | Total number of patients with COPD [12,13]. | 3,192,001 |
| Percentage of patients with mild COPD [14]. | 56.40% |
| Number of COPD patients followed up in PC [16]. | 863,583 |
| Cost of visit to hospital nurse [17]. | €45.72 |
| **Total (€)** | **€42,826,178.59** |
| **TOTAL INVESTMENT PROPOSAL 3** | | | **€68,093,645.96** |

**Table 4. Breakdown of the investment of Proposal 4. To agree with patients and caregivers on the treatment and management of COPD.**

| **Stakeholders** | **Investment description** | **Investment breakdown** | |
| --- | --- | --- | --- |
| **National Health Service** | Economic resources for online training of health personnel related to COPD management. | Cost of online training course on joint decision-making [3]. | €12,952.00 |
| **Total (€)** | **€12,952.00** |
| **National Health Service** | Economic resources for the development of an interactive decision-making tool. | Cost of developing a decision-making tool [3]. | €93,000.00 |
| Cost of the design of a decision-making tool [3]. | €6,250.00 |
| Cost of creating an interactive decision-making web tool [3]. | €12,000.00 |
| **Total (€)** | **€111,250.00** |
| **National Health Service** | Economic resources for sending SMS to disseminate the interactive tool among patients. | Total number of patients with COPD [12,13]. | 3,192,001 |
| Percentage of patients with mild COPD [14]. | 56.40% |
| Cost of sending an SMS through mass mailing systems [3]. | €0.03 |
| **Total (€)** | **€52,208.37** |
| **PC Nurses** | Working time. | Total number of patients with COPD [12,13]. | 3,192,001 |
| Percentage of patients with mild COPD [14]. | 56.40% |
| Cost of telephone consultation [17]. | €14.50 |
| Percentage of COPD patients under 65 years of age [18]. | 22.75% |
| Cost of visit to PC nurse [17]. | €25.97 |
| **Total (€)** | **€62,221,258.45** |
| **PROPOSAL 4 TOTAL INVESTMENT** | | | **€62,397,668.82** |

**Table 5. Breakdown of the investment of Proposal 5. To establish coordinated programs between primary and specialized care, and of these with other centers and nursing homes, to enable comprehensive COPD management.**

| **Stakeholders** | **Investment description** | **Investment breakdown** | |
| --- | --- | --- | --- |
| **National Health Service** | Economic resources for the access tool to the Electronic Medical Record (EMR) of patients living in nursing homes. | Annual cost per user of the EMR management tool [3]. | €120.00 |
| Number of public nursing homes in Spain [19]. | 1,573 |
| **Total (€)** | **€188,760.00** |
| **National Health Service** | Economic resources for training in the use of the EMR access tool. | Cost of online training course for the use of an access tool to the EMR [3]. | €12,952.00 |
| **Total (€)** | **€12,952.00** |
| **National Health Service** | Economic resources for the training of hospital nurses in case management and COPD. | Cost of a master's degree in pulmonology service nursing [20]. | €3,900.00 |
| Number of NHS hospitals with pulmonology services [15]. | 276 |
| Level of implementation of Case Management Nurses in the NHS [4]. | 50.00% |
| **Total (€)** | **€538,200.00** |
| **Hospital case management nurses (HCMN)** | Working time. | Total number of COPD patients [12,13]. | 3,192,001 |
| Percentage of patients with moderate COPD [14]. | 38.30% |
| Percentage of patients with severe COPD [14]. | 4.60% |
| Percentage of patients with very severe COPD[14]. | 0.50% |
| Percentage of COPD patients who have lived in a nursing home in the past 12 months [21]. | 3.80% |
| Cost of specialized nurse home visit [17]. | €79.22 |
| **Total (€)** | **€4,170,452.05** |
| **PROPOSAL 5 TOTAL INVESTMENT** | | | **€4,910,364.05** |

**Table 6. breakdown of the investment of Proposal 6. To promote the use of a compatible primary/specialized care medical record to identify patients included in chronicity strategies.**

| **Stakeholders** | **Investment description** | **Investment breakdown** | |
| --- | --- | --- | --- |
| **National Health Service** | Economic resources for the maintenance and support of the EMR. | Total number of COPD patients [12,13]. | 3,192,001 |
| Percentage of patients with moderate COPD [14]. | 38.30% |
| Percentage of patients with severe COPD [14]. | 4.60% |
| Percentage of patients with very severe COPD [14]. | 0.50% |
| Expenditure per person in vertical information systems of the EMR [22]. | €4.57 |
| **Total (€)** | **€6,330,812.43** |
| **National Health Service** | Economic resources for EMR utilization training. | Cost of online EMR utilization training course[3]. | €12,952.00 |
| **Total (€)** | **€12,952.00** |
| **National Health Service** | Economic resources for the identification of patients at risk. | Cost of statistical analysis for the identification of patients in the EMR [3]. | €5,000.00 |
| Number of autonomies in Spain. | 19 |
| **Total (€)** | **€95,000.00** |
| **PC Nurses** | Working time. | Total number of COPD patients [12,13]. | 3,192,001 |
| Percentage of patients with moderate COPD [14]. | 38.30% |
| Percentage of patients with severe COPD [14]. | 4.60% |
| Percentage of patients with very severe COPD [14]. | 0.50% |
| Percentage of COPD patients exacerbated in a 2-year period [23]. | 51.20% |
| Duration of the study (years)[23]. | 2 |
| Percentage of exacerbated COPD patients requiring hospitalization [23]. | 24.40% |
| Percentage of hospitalized COPD patients with at least one comorbidity [24]. | 38.00% |
| Cost of visiting a PC nurse [17]. | €25.97 |
| **Total (€)** | **€853,961.10** |
| **PROPOSAL 6 TOTAL INVESTMENT** | | | **€7,292,725.52** |

**Table 7. Breakdown of the investment of Proposal 7. To provide training on therapeutic adherence.**

| **Stakeholders** | **Investment description** | **Investment breakdown** | |
| --- | --- | --- | --- |
| **Pulmonologists, pharmacy, or PC professionals with experience in COPD** | Working time spent on training outside of working hours. | Number of PC nurses [9]. | 37,537 |
| Number of PC nurses for each training course taught by pulmonologists, pharmacy or PC professionals with experience in COPD [4]. | 20 |
| Number of hours of each training course for PC nurses [4]. | 20 |
| Rate per hour of face-to-face training [7]. | €125.00 |
| **Total (€)** | **€4,692,125.00** |
| **PC Nurses** | Working time spent on training outside of working hours. | Number of COPD patients for each group training session by PC nurses [4]. | 8 |
| Number of hours of each group training session by PC nurses [4]. | 4 |
| Rate per hour of face-to-face training [7]. | €125.00 |
| Number of COPD patients followed by PC [16]. | 863,583 |
| Number of individual PC nurses visits per patient for adherence training [4]. | 2 |
| Cost of visit to PC nurse [17]. | €25.97 |
| **Total (€)** | **€87,614,813.27** |
| **PROPOSAL 7 TOTAL INVESTMENT** | | | **€92,306,938.27** |

**Table 8. breakdown of the investment of Proposal 8. To ensure continuity of care after an exacerbation, in coordination with primary care.**

| **Stakeholders** | **Investment description** | **Investment breakdown** | |
| --- | --- | --- | --- |
| **National Health Service** | Human and material resources for the continuity of care carried out entirely from PC. | Total number of COPD patients [12,13]. | 3,192,001 |
| Percentage of COPD patients exacerbated in a 2-year period [23]. | 51.20% |
| Percentage of exacerbated COPD patients that DO NOT require hospitalization [23]. | 75.60% |
| Duration of the study (years) [23]. | 2 |
| Percentage of non-hospitalized exacerbated COPD patients referred to PC for post-exacerbation follow-up [4]. | 80.00% |
| Cost of follow-up visit to GP [17]. | €50.06 |
| Cost of visiting a PC nurse [17]. | €25.97 |
| Cost of telephone consultation [17]. | €14.50 |
| **Total (€)** | **€89,482,329.93** |
| **National Health Service** | Human and material resources for the continuity of care started in PC and ended in specialized care (SC). | Percentage of COPD patients exacerbated in a 2-year period [23]. | 51.20% |
| Percentage of exacerbated COPD patients that DO NOT require hospitalization [23]. | 75.60% |
| Duration of the study (years) [23]. | 2 |
| Percentage of non-hospitalized exacerbated COPD patients referred to PC for post-exacerbation follow-up [4]. | 20.00% |
| Cost of a follow-up visit to GP [17]. | €50.06 |
| Cost of the first visit to SC [17]. | €151.75 |
| Cost of a follow-up visit to SC [17]. | €88.30 |
| Cost of visit to specialized nurse [17]. | €45.72 |
| **Total (€)** | **€47,142,149.98** |
| **National Health Service** | Human and material resources for the continuity of care carried out entirely from SC. | Number of COPD patients hospitalized annually [9]. | 80,436 |
| Percentage of hospitalized patients with exacerbated COPD referred to SC for post-exacerbation follow-up [4]. | 80.00% |
| Cost of the first visit to SC [17]. | €151.75 |
| Cost of a follow-up visit to SC [17]. | €88.30 |
| Cost of visit to hospital nurse [17]. | €45.72 |
| **Total (€)** | **€21,331,161.85** |
| **National Health Service** | Human and material resources for the continuity of care started in SC and ended in PC. | Number of COPD patients hospitalized annually [9]. | 80,436 |
| Percentage of hospitalized patients with exacerbated COPD referred to PC for post-exacerbation follow-up [4]. | 20.00% |
| Cost of the first visit to SC [17]. | €151.75 |
| Cost of a follow-up visit to GP [17]. | €50.06 |
| Cost of visiting a PC nurse [17]. | €25.97 |
| Cost of telephone consultation [17]. | €14.50 |
| **Total (€)** | **€5,353,986.69** |
| **PROPOSAL 8 TOTAL INVESTMENT** | | | **€163,309,628.45** |

**Table 9. Breakdown of the investment of Proposal 9. To ensure availability of adequate resources for exacerbations that require hospitalization.**

| **Stakeholders** | **Investment description** | **Investment breakdown** | |
| --- | --- | --- | --- |
| **National Health Service** | Economic and material resources. | Number of NHS hospitals with intensive care services [15]. | 205 |
| Percentage of intensive care services that have Intermediate Respiratory Care Units (IRCU) [25]. | 18.14% |
| Estimated cost of creating an IRCU (human resources, consumables, pharmacy and laboratory) [26]. | €637,452.26 |
| **Total (€)** | **€106,968,255.43** |
| **PROPOSAL 9 TOTAL INVESTMENT** | | | **€106,968,255.43** |

**Table 10. Breakdown of the investment of Proposal 10. To reconcile and explain medication at hospital discharge.**

| **Stakeholders** | **Investment description** | **Investment breakdown** | |
| --- | --- | --- | --- |
| **National Health Service** | Economic resources for the elaboration of leaflets for the patient. | Fees / expert for the creation and validation of the leaflets’ content for patients on medication reconciliation [3]. | €1,200.00 |
| Number of experts to create leaflets on medication reconciliation for patients [4]. | 8 |
| Cost of designing leaflets for patients on medication reconciliation [3]. | €2,000.00 |
| Cost of SEPAR's scientific endorsement [10]. | €9,000.00 |
| Number of COPD patients hospitalized annually [27]. | 80,436 |
| Printing cost for each patient’s leaflet on medication reconciliation [3]. | €1.50 |
| **Total (€)** | **€141,254.00** |
| **National Health Service** | Economic resources for the elaboration of a pharmaco-therapeutic report model. | Fees / expert for the creation and validation of the leaflets’ content for patients on medication reconciliation [3]. | €1,200.00 |
| Number of experts required to create leaflets on medication reconciliation for patients [4]. | 8 |
| Cost of SEPAR's scientific endorsement [10]. | €9,000.00 |
| **Total (€)** | **€18,600.00** |
| **Hospital pharmacy professionals** | Working time. | Number of COPD patients hospitalized annually [27]. | 80,436 |
| Percentage of COPD patients with medication reconciliation at hospital discharge without following the reconciliation circuit [28]. | 50.80% |
| Cost of the first visit to SC [17]. | €151.75 |
| Number of explanatory visits by the pharmacy upon discharge from hospital [4]. | 1 |
| **Total (€)** | **€6,005,446.12** |
| **PROPOSAL 10 TOTAL INVESTMENT** | | | **€6,165,300.12** |

**Table 11. Breakdown of the investment of Proposal 11. To implement a smoking cessation plan for smokers with COPD.**

| **Stakeholders** | **Investment description** | **Investment breakdown** | |
| --- | --- | --- | --- |
| **National Health Service** | Economic resources. | Total number of patients with COPD [12,13]. | 3,192,001 |
| Percentage of COPD patients who smoke [12]. | 30.90% |
| Percentage of COPD patients who have tried to quit smoking in the past 12 months [29]. | 30.18% |
| Cost / smoker per pharmacological intervention to quit smoking [4]. | €254.04 |
| **Total (€)** | **€75,626,921.91** |
| **PC Nurses** | Working time. | Total number of patients with COPD [12,13]. | 3,192,001 |
| Percentage of COPD patients who smoke [12]. | 30.90% |
| Percentage of COPD patients who have tried to quit smoking in the past 12 months [29]. | 30.18% |
| Cost / smoker per intervention to quit smoking with telephone support [30]. | €160.75 |
| **Total (€)** | **€47,854,777.58** |
| **PROPOSAL 11 TOTAL INVESTMENT** | | | **€123,481,699.49** |

**Table 12. Breakdown of the investment of Proposal 12. To implement a social evaluation of the patient from a multidimensional point of view.**

| **Stakeholders** | **Investment description** | **Investment breakdown** | |
| --- | --- | --- | --- |
| **Social Work Professionals** | Time spent working with patients on hospital palliative care (PalC) services. | Number of patients with COPD and indication for PalC [31,32]. | 23,156 |
| Percentage of patients with indication for PalC who are being cared for by hospital PalC teams [33]. | 17.90% |
| Percentage of PalC resources (teams / units) that have a social work professional [34]. | 16.73% |
| Average stay (days) per hospitalization of a patient with COPD in the PalC Unit [35]. | 19 |
| Number of daily follow-up visits for patients with an indication for hospital PalC [36,37]. | 1 |
| Cost of visit to social work in PC[17]. | €36.27 |
| **Total (€)** | **€2,428,670.77** |
| **Social Work Professionals** | Time spent working with non-complex patients in home PalC. | Number of patients with COPD and indication for PalC [31,32]. | 23,156 |
| Percentage of patients with PalC indication who are being cared for by PalC home teams [33]. | 30.70% |
| Percentage of PalC resources (teams / units) that have a social work professional [34]. | 16.73% |
| Percentage of patients with indication for PalC who are being cared for by hospital PalC teams [33]. | 17.90% |
| Percentage of patients with indication for PalC classified as "not complex" [4]. | 50.00% |
| Mean survival (months) of patients with COPD after access to home PalC [38]. | 8.30 |
| Number of monthly follow-up visits for non-complex patients with indication for home PalC [36]. | 1 |
| Cost of telephone consultation [17]. | €14.50 |
| Cost of social work home visit [17]. | €72.64 |
| **Total (€)** | **€1,590,475.57** |
| **Social Work Professionals** | Working time with complex or very complex patients in home PalC. | Number of patients with COPD and indication for PalC [31,32]. | 23,156 |
| Percentage of patients with an indication for PalC who are being cared for by home PalC teams [33]. | 30.70% |
| Percentage of PalC resources (teams / units) that have a social work professional [34]. | 16.73% |
| Percentage of patients with indication for PalC who are being cared for by hospital PalC teams [33]. | 17.90% |
| Percentage of patients with PalC indication who are being cared for by PalC home teams [33]. | 30.70% |
| Percentage of patients with indication for PalC classified as "complex" or "very complex"[4]. | 50.00% |
| Mean survival (months) of patients with COPD after access to home PalC [38]. | 8.30 |
| Number of weeks in a month. | 4.35 |
| Number of weekly follow-up visits for patients with indication for "complex" or "very complex" home PalC"[4]. | 2 |
| Cost of telephone consultation [17]. | €14.50 |
| Cost of social work home visit [17]. | €72.64 |
| **Total (€)** | **€9,838,023.00** |
| **PROPOSAL 12 TOTAL INVESTMENT** | | | **€13,857,169.34** |

**Table 13. Breakdown of the investment of Proposal 13. To promote the application of bioethical principles: inform patients and caregivers to facilitate their participation in decision making.**

| **Stakeholders** | **Investment description** | **Investment breakdown** | |
| --- | --- | --- | --- |
| **Nurses from PalC teams** | Working time with non-complex patients. | Number of patients with COPD and indication for PalC [31,32]. | 23,156 |
| Percentage of deceased patients in Spain with whom a conversation about preferences regarding end-of-life care was recorded in the last 3 months of life [39]. | 7.00% |
| Percentage of patients with indication for PalC classified as "not complex" [4]. | 50.00% |
| Mean survival (months) after access of COPD patients to home PalC [38]. | 8.30 |
| Number of monthly follow-up visits for "non-complex" patients with indication for home PalC" [36]. | 1 |
| Cost of telephone consultation [17]. | €14.50 |
| Cost of PalC nurse home visit [17]. | €45.00 |
| **Total (€)** | **€1,624,283.41** |
| **Nurses from PalC teams** | Working time with complex or very complex patients. | Number of patients with COPD and indication for PalC [31,32]. | 23,156 |
| Percentage of deceased patients in Spain with whom a conversation about preferences regarding end-of-life care was recorded in the last 3 months of life [39]. | 7.00% |
| Percentage of patients with indication for PalC classified as "complex" or "very complex" [4]. | 50.00% |
| Mean survival (months) after access of COPD patients to home PalC [38] | 8.30 |
| Number of weeks in a month. | 4.35 |
| Number of weekly follow-up visits for patients with indication for "complex" or "very complex" home PalC [4]. | 2 |
| Cost of telephone consultation [17]. | €14.50 |
| Cost of PC nurse home visit [17]. | €45.00 |
| **Total (€)** | **€11,590,172.17** |
| **PROPOSAL 13 TOTAL INVESTMENT** | | | **€13,214,455.58** |

**Table 14. Breakdown of the investment of Proposal 14. To develop a pharmacological and non-pharmacological palliative care plan for end-stage patients.**

| **Stakeholders** | **Investment description** | **Investment breakdown** | |
| --- | --- | --- | --- |
| **National Health Service** | Economic resources. | Cost of SEPAR's scientific endorsement [10]. | €9,000.00 |
| Cost of SEPCAL’s scientific endorsement [40]. | €3,751.00 |
| Cost of the scientific endorsement of four scientific societies linked to PC [4,11]. | €12,000.00 |
| **Total (€)** | **€24,751.00** |
| **Working Group for the Clinical Practice Guideline** | Working time for the preparation of the CPG. | Number of experts that would comprise the CPG Working Group [41]. | 12 |
| Fees / expert for the preparation of a CPG [3]. | €2,400.00 |
| **Total (€)** | **€28,800.00** |
| **Working Group of the Clinical Practice Guideline** | Working time for the dissemination of the CPG. | Average cost of preparing and publishing an article in a scientific journal [3]. | €8,000.00 |
| Average cost of poster realization and face-to-face presentation in a scientific congress [3]. | €3,500.00 |
| Late registration non-member fee for SEPAR National Congress (face-to-face format 2019) [42]. | €1,028.00 |
| Days of duration of the National Congress of SEPAR (face-to-face format 2019) [43]. | 4 |
| Average daily spending per person for overnight stays [44]. | €112.29 |
| **Total (€)** | **€12,977.16** |
| **PROPOSAL 14 TOTAL INVESTMENT** | | | **€66,528.16** |

**Table 15. Breakdown of the investment of Proposal 15. To promote training on the management of palliative respiratory patients, especially in advanced and terminal phases.**

| **Stakeholders** | **Investment description** | **Investment breakdown** | |
| --- | --- | --- | --- |
| **National Health Service** | Economic resources for the continuous training of health professionals. | Number of professionals in PalC resources [34]. | 2,711 |
| Percentage of PalC resource professionals in need of PalC training [34]. | 42.01% |
| Number of PC professionals expected to care for patients with COPD and in need of PalC [45]. | 61,092 |
| Percentage of PC professionals in need of PalC training [46] | 29.50% |
| Number of SC professionals expected to care for patients with COPD and in need of PalC [47]. | 5,031 |
| Percentage of SC professionals in need of PalC training [48]. | 89.90% |
| Average cost per person and continuous training course [49]. | €99.15 |
| **Total (€)** | **€2,348,282.50** |
| **National Health Service** | Economic resources to hold the scientific conference. | Cost of direction and coordination of the scientific conference on PalC in COPD [3]. | €4,840.00 |
| Fees for the opening and closing conferences of the scientific conference on PalC in COPD [3]. | €3,630.00 |
| Cost of technical secretariat for the academic aspects of the scientific conference on PalC in COPD [3]. | €10,829.50 |
| Logistics cost of the scientific conference on PalC in COPD [3]. | €32,319.10 |
| Cost of the online platform of the scientific conference on PalC in COPD [3]. | €3,025.00 |
| Cost of final report of the scientific conference on PalC in COPD [3]. | €10,285.00 |
| Cost of 250 'save the date' flyers for the scientific conference on PalC in COPD [3]. | €1,421.75 |
| Number of members of the COPD PalC expert group that would provide training in the scientific conferences on PalC in COPD [4]. | 8 |
| Fee for participating in a 1-day paid shift [7]. | €500.00 |
| Cost of SEPAR’S scientific endorsement for the development of scientific conferences [10]. | €12,000.00 |
| Cost of the SECPAL’S scientific endorsement [40]. | €3,751.00 |
| Cost of a first application for the accreditation of a face-to-face course [8]. | €102.01 |
| **Total (€)** | **€86,203.36** |
| **PROPOSAL 15 TOTAL INVESTMENT** | | | **€2,434,485.86** |

## Return

The following tables show the returns and their monetization for each proposal in detail. The total impact of each return is calculated as follows:

= (return indicator) * (*proxy* [return or change value]) * (1 - % deadweight [what would have happened anyway]) * (1 - % return displacement) * (1 - % attribution [part of the return due to other causes]).

**Table 16. Return breakdown of Proposal 1. To ensure spirometry availability in primary care, and to provide training on its use and interpretation.**

| Return | Return breakdown | | |
| --- | --- | --- | --- |
| Return 1.1. The number of referrals from PC to pulmonology would be reduced. | **Indicator** | Number of consultations with COPD patients from PC to pulmonology that would be avoided [4,50,51]. | 6,517 |
| ***Proxy*** | Cost of first visit to SC [17]. | €151.75 |
| **Deadweight** | Not applicable. | 0.00% |
| **Attribution** | Not applicable. | 0.00% |
|  | **Total (€)** | **€988,941.87** |
| Return 1.2. The number of misdiagnoses of COPD in PC would be reduced. | **Indicator** | Number of misdiagnosed COPD patients who would receive a correct diagnosis [4,13,52,53]. | 13,691 |
| ***Proxy*** | Average annual cost of treating a patient with COPD [21]. | €3,125.76 |
| **Deadweight** | Not applicable. | 0.00% |
| **Attribution** | Shared by 1.2 y 2.1. | 50.00% |
|  | **Total (€)** | **€0.00** |
| Return 1.3. The number of initial diagnostic X-rays would be reduced. | **Indicator** | Number of patients for whom an initial diagnostic X-ray would not be required [13,52,54]. | 1,796 |
| ***Proxy*** | Chest X-ray cost [17]. | €19.74 |
| **Deadweight** | Not applicable. | 0.00% |
| **Attribution** | Not applicable. | 0.00% |
|  | **Total (€)** | **€35,445.08** |
| Return 1.4. The number of blood gas tests for the initial diagnostic examination would be reduced. | **Indicator** | Number of patients for whom a scanning arterial blood gas would not be required for initial diagnosis [13,52,54]. | 7,375 |
| ***Proxy*** | Cost of arterial blood gas [17]. | €27.39 |
| **Deadweight** | Not applicable. | 0.00% |
| **Attribution** | Not applicable. | 0.00% |
|  | **Total (€)** | **€201,958.12** |
| Return 1.5. Losses in labor productivity in COPD patients associated with time spent in unnecessary diagnostic tests would be reduced. | **Indicator** | Number of lost hours of labor productivity that would be avoided [4,13,21,52,54]. | 1,449 |
| ***Proxy*** | Average wage per regular working hour [55]. | €15.48 |
| **Deadweight** | Not applicable. | 0.00% |
| **Attribution** | Not applicable. | 0.00% |
|  | **Total (€)** | **€22,429.25** |
| Return 1.6. The burden on informal caregivers of COPD patients associated with time spent in unnecessary diagnostic tests would be reduced. | **Indicator** | Number of hours of informal care that would be avoided [4,13,21,52,54]. | 3,210 |
| ***Proxy*** | Cost per hour of informal care [56]. | €7.04 |
| **Deadweight** | Not applicable. | 0.00% |
| **Attribution** | Not applicable. | 0.00% |
|  | **Total (€)** | **€22,595.79** |
| PROPOSAL 1 TOTAL RETURN | | | **€1,271,370.10** |

**Table 17. Return breakdown of Proposal 2. To provide training on COPD for primary care professionals.**

| Return | Return breakdown | | |
| --- | --- | --- | --- |
| Return 2.1. The number of misdiagnoses of COPD in PC would be reduced. | **Indicator** | Number of misdiagnosed COPD patients who would receive a correct diagnosis [4,13,52,53]. | 13,691 |
| **Proxy** | Average annual cost of treating a patient with COPD [21]. | €3,125.76 |
| **Deadweight** | Not applicable. | 0.00% |
| **Attribution** | Shared by 1.2 y 2.1. | 50.00% |
|  | **Total (€)** | **€0.00** |
| Return 2.2. The healthcare costs associated with the inappropriate use of inhaled corticosteroids in COPD patients would be reduced. | **Indicator** | Number of patients who would have an appropriate inhaled corticosteroid treatment [4,50,57,58]. | 57,065 |
| **Proxy** | Average annual savings per patient with COPD with appropriate use of inhaled corticosteroids (vs. inappropriate use) [59]. | €433.00 |
| **Deadweight** | Not applicable. | 0.00% |
| **Attribution** | Not applicable. | 0.00% |
|  | **Total (€)** | **€24,708,995.88** |
| PROPOSAL 2 TOTAL RETURN | | | **€24,708,995.88** |

**Table 18. Return breakdown of Proposal 3. To inform patients and families about the disease and its treatments.**

| Return | Return breakdown | | |
| --- | --- | --- | --- |
| Return 3.1. The understanding of low-risk COPD patients about their disease and possible treatments would improve. | **Indicator** | Number of low-risk COPD patients who would be better informed about the disease and its treatments [12–14,60]. | 1,449,232 |
| **Proxy** | Minimum annual contribution for COPD patients association [61]. | €5.00 |
| **Deadweight** | Percentage of COPD patients with inadequate health literacy [62]. | 41.00% |
| **Attribution** | Shared by 3.1 y 4.2 | 50.00% |
|  | **Total (€)** | **€2,137,617.64** |
| Return 3.2. The satisfaction of low-risk COPD patients with the National Health Service would be improved. | **Indicator** | Number of low-risk COPD patients who would improve their satisfaction with the NHS thanks to being better informed [12–14]. | 1,800,289 |
| **Proxy** | Average annual premium per private insurance policyholder [63]. | €797.86 |
| **Deadweight** | Percentage of people aged 45 years and over who believe that the health system works quite well [64]. | 24.81% |
| **Attribution** | Not applicable. | 0.00% |
|  | **Total (€)** | **€1,079,966,938.13** |
| Return 3.3. Loss of labor productivity would occur in low-risk COPD patients due to visits to the nursing staff to obtain information. | **Indicator** | Number of hours of labor productivity that would be lost in low-risk COPD patients due to visits to the nursing staff [4,13,14,21,31,50]. | 216,223 |
| **Proxy** | Average wage per regular working hour [55]. | -€15.48 |
| **Deadweight** | Not applicable | 0.00% |
| **Attribution** | Not applicable. | 0.00% |
|  | **Total (€)** | **-€3,347,124.87** |
| Return 3.4. Informal caregivers of low-risk COPD patients' satisfaction with the National Health Service would be improved. | **Indicator** | Number of informal caregivers of low-risk COPD patients who would improve their satisfaction with the NHS thanks to the information received [12–14,21]. | 315,050 |
| **Proxy** | Average annual premium per private insurance policyholder [63]. | €797.86 |
| **Deadweight** | Percentage of people aged 55 years and over who believe that the health system works quite well [64]. | 28.65% |
| **Attribution** | Not applicable. | 0.00% |
|  | **Total (€)** | **€179.358.416,90** |
| Return 3.5. The burden of informal caregivers of low-risk COPD patients would increase because they would accompany them to their visits to the nurse for information. | **Indicator** | Number of hours of informal care that would increase due to visits to the nurse [4,12–14,21,50]. | 478,974 |
| **Proxy** | Cost per hour of informal care [56]. | -€7.04 |
| **Deadweight** | Not applicable. | 0.00% |
| **Attribution** | Not applicable. | 0.00% |
|  | **Total (€)** | **-€3,371,976.78** |
| PROPOSAL 3 TOTAL RETURN | | | **€1,254,743,871.02** |

**Table 19. Return breakdown of Proposal 4. To agree with patients and caregivers on the treatment and management of COPD.**

| Return | Return breakdown | | |
| --- | --- | --- | --- |
| Return 4.1. Adherence to treatment of low-risk COPD patients would improve. | **Indicator** | Number of low-risk COPD patients who would improve their adherence [4,12–14]. | 180,029 |
| **Proxy** | Annual mean savings in direct healthcare costs per patient with COPD adherent to treatment (vs. non-adherent) [65]. | €444.58 |
| **Deadweight** | Percentage of COPD adherent patients [66]. | 59.00% |
| **Attribution** | Shared by 4.1, 7.1 y 10.1 | 60.00% |
|  | **Total (€)** | **€13,126,105.59** |
| Return 4.2. Knowledge of the disease in low-risk COPD patients would improve. | **Indicator** | Number of low-risk COPD patients who would improve their knowledge about the disease [4,12–14]. | 180,029 |
| **Proxy** | Minimum annual contribution for COPD patients association[61]. | €5.00 |
| **Deadweight** | Percentage of COPD patients with inadequate health literacy [62]. | 41.00% |
| **Attribution** | Shared by 3.1 y 4.2 | 50.00% |
|  | **Total (€)** | **€265,542.56** |
| Return 4.3. The perceived health status of low-risk COPD patients would improve. | **Indicator** | Number of low-risk COPD patients who would improve their perceived health status [4,12–14]. | 180,029 |
| **Proxy** | Average expenditure per person per year on games and hobbies [67]. | €18.88 |
| **Deadweight** | Percentage of COPD patients who perceive that they are in a good or very good state of health [68]. | 25.20% |
| **Attribution** | Not applicable. | 0.00% |
|  | **Total (€)** | **€2,542,440.63** |
| Return 4.4. It would reduce the burden on informal caregivers of low-risk COPD patients, thanks to improved joint decision-making. | **Indicator** | Number of hours of informal care per year that would be avoided thanks to joint decision-making [4,12–14]. | 3,780,606 |
| **Proxy** | Cost per hour of informal care [56]. | €7.04 |
| **Deadweight** | Percentage of COPD patients who perceive that they are in a good or very good state of health [68]. | 25.20% |
| **Attribution** | Not applicable. | 0.00% |
|  | **Total (€)** | **€19,908,368.72** |
| Return 4.5. The burden of informal caregivers of patients with low-risk COPD would increase, since they would accompany patients 65 years of age or older to a visit to the nurse. | **Indicator** | Number of hours of informal care per year that would increase as a result of accompanying COPD patients to see the nurse [4,12–14,18,21]. | 243,377 |
| **Proxy** | Cost per hour of informal care [56]. | -€7.04 |
| **Deadweight** | Not applicable. | 0.00% |
| **Attribution** | Not applicable. | 0.00% |
|  | **Total (€)** | **-€1,713,370.64** |
| PROPOSAL 4 TOTAL RETURN | | | **€34,129,086.85** |

**Table 20. Return breakdown of Proposal 5. To establish coordinated programs between primary and specialized care, and of these with other centers and nursing homes, to enable comprehensive COPD management.**

| Return | Return breakdown | | |
| --- | --- | --- | --- |
| Return 5.1. The number of hospital admissions of resident COPD patients with a moderate-high risk level would decrease, thanks to integrated care programs. | **Indicator** | Number of hospitalizations of COPD patients with a moderate-high risk level that would be avoided thanks to the coordination between PC-SC and the centers and nursing homes [12–14,21,69]. | 13,756 |
| **Proxy** | Average cost per hospitalization of a patient with COPD [27]. | €3,397.73 |
| **Deadweight** | Level of implementation of HCMN in the NHS [4]. | 50.00% |
| **Attribution** | Shared by 5.1 y 6.1 | 10.76% |
|  | **Total (€)** | **€20,855,756.78** |
| Return 5.2. The number of visits to the emergency room of resident COPD patients with a moderate-high risk level would decrease, thanks to integrated care programs. | **Indicator** | Number of visits to the emergency room in COPD patients with a moderate-high risk level that would be avoided thanks to the coordination between PC-SC and the centers and nursing homes [12–14,21,69]. | 7,484 |
| **Proxy** | Cost of visit to the emergency room [17]. | €182.25 |
| **Deadweight** | Level of implementation of HCMN in the NHS [4]. | 50.00% |
| **Attribution** | Not applicable. | 0.00% |
|  | **Total (€)** | **€681,943.68** |
| Return 5.3. The satisfaction of resident COPD patients with a moderate-high risk level would improve thanks to coordinated programs between PC-SC and the centers-nursing homes. | **Indicator** | Number of COPD patients with moderate-high risk level living in nursing homes [4,12–14,21]. | 5,264 |
| **Proxy** | Average annual premium per private insurance policyholder [63]. | €797.86 |
| **Deadweight** | Level of implementation of HCMN in the NHS [4]. | 50.00% |
| **Attribution** | Shared by 5.3, 6.3 y 7.2 | 83.33% |
|  | **Total (€)** | **€350,012.87** |
| The burden of informal caregivers of resident COPD patients with a moderate-high risk level would be reduced by avoiding trips to SC thanks to HCMN in nursing homes. | **Indicator** | Number of hours of informal care that would be avoided thanks to HCMN in nursing homes [4,12–14,21]. | 105,285 |
| **Proxy** | Cost per hour of informal care[56]. | €7.04 |
| **Deadweight** | Level of implementation of HCMN in the NHS [4]. | 50.00% |
| **Attribution** | Not applicable. | 0.00% |
|  | **Total (€)** | **€370,603.06** |
| Return 5.5. The satisfaction of informal caregivers of resident COPD patients with a moderate-high risk level would be improved, by having coordinated care between PC-SC and the centers-nursing homes. | **Indicator** | Number of informal caregivers of COPD patients with moderate-high risk level living in nursing homes [4,12–14,21]. | 5,264 |
| **Proxy** | Average annual premium per private insurance policyholder [63]. | €797.86 |
| **Deadweight** | Level of implementation of HCMN in the NHS [4]. | 50.00% |
| **Attribution** | Shared by 5.5, 6.4 y 7.4 | 66.67% |
|  | **Total (€)** | **€700,025.74** |
| PROPOSAL 5 TOTAL RETURN | | | **€22,958,342.13** |

**Table 21. Return breakdown of Proposal 6. To promote the use of a compatible primary/specialized care medical record to identify patients included in chronicity strategies.**

| Return | Return breakdown | | |
| --- | --- | --- | --- |
| Return 6.1. The number of hospital admissions of COPD patients with a moderate-high risk level would decrease thanks to a correct identification in chronicity strategies. | **Indicator** | Number of hospitalizations of COPD patients with a moderate-high risk level that would be avoided [12–14,23,24,70]. | 2,959 |
| **Proxy** | Average cost per hospitalization of a COPD patient [27]. | €3,397.73 |
| **Deadweight** | Not applicable. | 0.00% |
| **Attribution** | Shared by 5.1 y 6.1 | 50.00% |
|  | **Total (€)** | **€5,027,678.70** |
| Return 6.2. The leisure life of COPD patients with a moderate-high risk level would improve thanks to a correct identification in chronicity strategies and to having direct recommendations adapted to their health status. | **Indicator** | Number of COPD patients with moderate-high risk level who would improve their leisure life [4,12–14,23,24,70]. | 3,288 |
| **Proxy** | Average expenditure per person per year on games and hobbies [67]. | €18.88 |
| **Deadweight** | Not applicable. | 0.00% |
| **Attribution** | Not applicable. | 0.00% |
|  | **Total (€)** | **€62,083.08** |
| Return 6.3. The satisfaction of COPD patients with a moderate-high risk level with the NHS would improve, thanks to a correct identification in chronicity strategies. | **Indicator** | Number of patients with COPD with a moderate-high risk level who would improve their satisfaction with the NHS thanks to the care received [4,12–14,23,24,70]. | 3,288 |
| **Proxy** | Average annual premium per private insurance policyholder [63]. | €797.86 |
| **Deadweight** | Percentage of people aged 45 and over who believe that the health system works quite well [64]. | 24.81% |
| **Attribution** | Shared by 5.3, 6.3 y 7.2 | 83.33% |
|  | **Total (€)** | **€328,763.22** |
| Return 6.4. The satisfaction of informal caregivers of COPD patients with a moderate-high risk level with the NHS would improve, thanks to a correct identification in the chronicity strategies. | **Indicator** | Number of informal caregivers of COPD patients with a moderate-high risk level who would improve their satisfaction with the NHS thanks to the care received [4,12–14,23,24,70]. | 575 |
| **Proxy** | Average annual premium per private insurance policyholder [63]. | €797.86 |
| **Deadweight** | Percentage of people aged 55 and over who believe that the health system works quite well [64]. | 28.65% |
| **Attribution** | Shared by 5.5, 6.4 y 7.4 | 66.67% |
|  | **Total (€)** | **€109,200.47** |
| Return 6.5. The burden of informal caregivers of COPD patients with a moderate-high risk level would increase due to having to accompany them to visit the nurse. | **Indicator** | Number of hours of informal care that would be increased by accompanying COPD patients with a moderate-high risk level to visit the nurse [4,12–14,23,24,70]. | 5,754 |
| **Proxy** | Cost per hour of informal care[56]. | -€7.04 |
| **Deadweight** | Not applicable. | 0.00% |
| **Attribution** | Not applicable. | 0.00% |
|  | **Total (€)** | **-€40,511.36** |
| PROPOSAL 6 TOTAL RETURN | | | **€5,487,214.11** |

**Table 22. Return breakdown of Proposal 7. To provide training on therapeutic adherence.**

| Return | Return breakdown | | |
| --- | --- | --- | --- |
| Return 7.1. Direct healthcare costs for COPD patients would be reduced, thanks to improved adherence. | **Indicator** | Number of patients with COPD who would not lose their adherence to treatment [50,71]. | 125,220 |
| **Proxy** | Average annual savings in direct healthcare costs per patient with COPD adherent to treatment (vs. non-adherent) [65]. | €444.58 |
| **Deadweight** | Not applicable. | 0.00% |
| **Attribution** | Shared by 4.1, 7.1 y 10.1 | 80.00% |
|  | **Total (€)** | **€11,134,020.17** |
| Return 7.2. Patient satisfaction with the NHS would improve. | **Indicator** | Number of COPD patients who would improve their satisfaction with the NHS [50,72]. | 129,537 |
| **Proxy** | Average annual premium per private insurance policyholder [63]. | €797.86 |
| **Deadweight** | Percentage of people aged 45 and over who believe that the NHS works quite well [64]. | 24.81% |
| **Attribution** | Shared by 5.3, 6.3 y 7.2 | 2.20% |
|  | **Total (€)** | **€75,997,457.87** |
| Return 7.3. Loss of labor productivity would occur as a consequence of attending educational sessions / visits. | **Indicator** | Number of work hours that would be lost due to attending educational sessions / visits [4,21,50]. | 375,227 |
| **Proxy** | Average wage per regular working hour [55]. | -€15.48 |
| **Deadweight** | Not applicable. | 0.00% |
| **Attribution** | Not applicable. | 0.00% |
|  | **Total (€)** | **-€5,808,511.07** |
| Return 7.4. The satisfaction of informal caregivers of COPD patients with the NHS would improve. | **Indicator** | Number of informal caregivers of COPD patients who would improve their satisfaction with the NHS [4,21,50]. | 75,564 |
| **Proxy** | Average annual premium per private insurance policyholder [63]. | €797.86 |
| **Deadweight** | Percentage of people aged 55 and over who believe that the health system works quite well [64]. | 28.65% |
| **Attribution** | Shared by 5.5, 6.4 y 7.4 | 2.58% |
|  | **Total (€)** | **€41,910,167.64** |
| Return 7.5. The burden of informal caregivers of COPD patients would increase as a result of accompanying them to educational sessions / visits. | **Indicator** | Number of hours of informal care to accompany patients to educational sessions [4,21,50]. | 831,199 |
| **Proxy** | Cost per hour of informal care [56]. | -€7.04 |
| **Deadweight** | Not applicable. | 0.00% |
| **Attribution** | Not applicable. | 0.00% |
|  | **Total (€)** | **-€5,851,638.41** |
| PROPOSAL 7 TOTAL RETURN | | | **€117,381,496.20** |

**Table 23. Return breakdown Proposal 8. To ensure continuity of care after an exacerbation, in coordination with primary care.**

| Return | Return breakdown | | |
| --- | --- | --- | --- |
| Return 8.1. The number of moderate exacerbations would be reduced thanks to the continuity of care carried out entirely from PC. | **Indicator** | Number of moderate exacerbations that could be prevented thanks to continuity of care [4,12,13,23,73]. | 741,321 |
| ***Proxy*** | Average healthcare cost per episode of moderate exacerbation in COPD patients [23]. | €397.38 |
| **Deadweight** | Not applicable. | 0.00% |
| **Attribution** | Not applicable. | 0.00% |
|  | **Total (€)** | **€294,585,740.26** |
| Return 8.2. The number of moderate exacerbations would be reduced thanks to the continuity of care started in PC and ended in CS. | **Indicator** | Number of moderate exacerbations that could be prevented thanks to continuity of care [4,12,13,23,73]. | 185,330 |
| ***Proxy*** | Average healthcare cost per episode of moderate exacerbation in COPD patients [23]. | €397.38 |
| **Deadweight** | Not applicable. | 0.00% |
| **Attribution** | Not applicable. | 0.00% |
|  | **Total (€)** | **€73,646,435.07** |
| Return 8.3. The number of serious exacerbations would be reduced thanks to the continuity of care carried out entirely from SC. | **Indicator** | Number of severe exacerbations that could be prevented thanks to continuity of care [23,47,73]. | 16,087 |
| ***Proxy*** | Average healthcare cost per episode of severe exacerbation in COPD patients [23]. | €960.61 |
| **Deadweight** | Not applicable. | 0.00% |
| **Attribution** | Not applicable. | 0.00% |
|  | **Total (€)** | **€15,453,566.83** |
| Return 8.4. The number of serious exacerbations would be reduced thanks to the continuity of care started in CS and ended in PC. | **Indicator** | Number of severe exacerbations that could be prevented thanks to continuity of care [23,47,73]. | 4,022 |
| ***Proxy*** | Average healthcare cost per episode of severe exacerbation in COPD patients [23]. | €960.61 |
| **Deadweight** | Not applicable. | 0.00% |
| **Attribution** | Not applicable. | 0.00% |
|  | **Total (€)** | **€3,863,391.71** |
| Return 8.5. Loss of labor productivity would occur as a consequence of attending post-exacerbation follow-up visits carried out entirely from PC. | **Indicator** | Number of working hours that would be lost due to attending post-exacerbation follow-up visits on PC [4,12,13,21,23]. | 195,214 |
| ***Proxy*** | Average wager per regular working hour [55]. | -€15.48 |
| **Deadweight** | Not applicable. | 0.00% |
| **Attribution** | Not applicable. | 0.00% |
|  | **Total (€)** | **-€3,021,919.00** |
| Return 8.6. Loss of labor productivity would occur as a consequence of attending post-exacerbation follow-up visits started at PC and ended at SC. | **Indicator** | Number of working hours that would be lost due to attending post-exacerbation follow-up visits in PC and SC [4,12,13,21,23]. | 87,846 |
| ***Proxy*** | Average wage per regular working hour [55]. | -€15.48 |
| **Deadweight** | Not applicable. | 0.00% |
| **Attribution** | Not applicable. | 0.00% |
|  | **Total (€)** | **-€1,359,863.55** |
| Return 8.7. Loss of labor productivity would occur as a consequence of attending post-exacerbation follow-up visits carried out entirely from SC. | **Indicator** | Number of working hours that would be lost due to attending post-exacerbation follow-up visits in SC [4,21,50]. | 40,668 |
| ***Proxy*** | Average wage per regular working hour [55]. | -€15.48 |
| **Deadweight** | Not applicable. | 0.00% |
| **Attribution** | Not applicable. | 0.00% |
|  | **Total (€)** | **-€629,547.48** |
| Return 8.8. Loss of labor productivity would occur as a consequence of attending post-exacerbation follow-up visits started in SC and ended in PC. | **Indicator** | Number of working hours that would be lost due to attending post-exacerbation follow-up visits in SC and PC [4,21,50]. | 7,625 |
| ***Proxy*** | Average wage per regular working hour [55]. | -€15.48 |
| **Deadweight** | Not applicable. | 0.00% |
| **Attribution** | Not applicable. | 0.00% |
|  | **Total (€)** | **-€118,040.15** |
| Return 8.9. The burden of informal caregivers of COPD patients would increase as a consequence of having to accompany them to post-exacerbation follow-up visits, carried out entirely from PC. | **Indicator** | Number of hours of informal care to accompany patients to post-exacerbation follow-up visits [4,12,13,21,23]. | 432,437 |
| ***Proxy*** | Cost per hour of informal care[56]. | -€7.04 |
| **Deadweight** | Not applicable. | 0.00% |
| **Attribution** | Not applicable. | 0.00% |
|  | **Total (€)** | **-€3,044,356.30** |
| Return 8.10. The burden of informal caregivers of COPD patients would increase as a consequence of having to accompany them to post-exacerbation follow-up visits started in PC and ended in SC. | **Indicator** | Number of hours of informal care to accompany patients to post-exacerbation follow-up visits [4,12,13,21,23]. | 194,597 |
| ***Proxy*** | Cost per hour of informal care [56]. | -€7.04 |
| **Deadweight** | Not applicable. | 0.00% |
| **Attribution** | Not applicable. | 0.00% |
|  | **Total (€)** | **-€1,369,960.34** |
| Return 8.11. The burden of informal caregivers of COPD patients would increase as a consequence of having to accompany them to post-exacerbation follow-up visits carried out entirely from SC. | **Indicator** | Number of hours of informal care to accompany patients to post-exacerbation follow-up visits [4,21,50]. | 90,088 |
| ***Proxy*** | Cost per hour of informal care [56]. | -€7.04 |
| **Deadweight** | Not applicable. | 0.00% |
| **Attribution** | Not applicable. | 0.00% |
|  | **Total (€)** | **-€634,221.77** |
| Return 8.12. The burden of informal caregivers of COPD patients would increase as a consequence of having to accompany them to post-exacerbation follow-up visits started in SC and ended in PC. | **Indicator** | Number of hours of informal care to accompany patients to post-exacerbation follow-up visits [4,21,50]. | 16,892 |
| ***Proxy*** | Cost per hour of informal care [56]. | -€7.04 |
| **Deadweight** | Not applicable. | 0.00% |
| **Attribution** | Not applicable. | 0.00% |
|  | **Total (€)** | **-€118,916.58** |
| PROPOSAL 8 TOTAL RETURN | | | **€377,252,308.69** |

**Table 24. Return breakdown of Proposal 9. To ensure availability of adequate resources for exacerbations that require hospitalization.**

| Return | Return breakdown | | |
| --- | --- | --- | --- |
| Return 9.1. The healthcare costs associated with the use of IRCU instead of ICU, in patients with exacerbation of COPD who require NIMV, would be reduced. | **Indicator** | Number of intensive care services where IRCUs would be used instead of ICU [15,25]. | 168 |
| **Proxy** | Cost saved per hospital by using IRCU instead of ICU [26] | €986,743.12 |
| **Deadweight** | Not applicable. | 0.00% |
| **Attribution** | Not applicable. | 0.00% |
|  | **Total (€)** | **€165,581,323.83** |
| PROPOSAL 9 TOTAL RETURN | | | **€165,581,323.83** |

**Table 25. Return breakdown of Proposal 10. To reconcile and explain medication at hospital discharge.**

| Return | Return breakdown | | |
| --- | --- | --- | --- |
| Return 10.1. The direct healthcare costs of COPD patients would be reduced, thanks to the reconciliation of medication. | **Indicator** | Number of COPD patients with medication reconciliation at hospital discharge [28,50]. | 50,594 |
| **Proxy** | Average annual savings in direct healthcare costs per patient with COPD with medication reconciliation at discharge (vs. without reconciliation) [65]. | €203.17 |
| **Deadweight** | Percentage of patients who would be reconciled even without following a conciliation circuit [28]. | 80.76% |
| **Attribution** | Shared by 4.1, 7.1 y 10.1 | 60.00% |
|  | **Total (€)** | **€790,958.18** |
| Return 10.2. The information and level of understanding of COPD patients regarding their drug treatment would improve, avoiding malpractice in this regard, which would have a positive impact in their quality of life. | **Indicator** | Number of patients with COPD who would improve their information and level of understanding regarding their pharmacological treatment [28,50]. | 50,594 |
| **Proxy** | Minimum annual contribution for the association of patients with COPD [61]. | €5.00 |
| **Deadweight** | Not applicable. | 0.00% |
| **Attribution** | Not applicable. | 0.00% |
|  | **Total (€)** | **€252,971.22** |
| Return 10.3. The information and level of understanding of informal caregivers of patients with COPD regarding drug treatment would be improved, avoiding malpractice in this regard, which would have a positive impact in the patient’s quality of life. | **Indicator** | Number of informal caregivers of people with COPD who would improve their information and level of understanding regarding the drug treatment of the patient [28,50]. | 50,594 |
| **Proxy** | Minimum annual contribution for the association of patients with COPD [61]. | €5.00 |
| **Deadweight** | Not applicable. | 0.00% |
| **Attribution** | Not applicable. | 0.00% |
|  | **Total (€)** | **€252,971.22** |
| PROPOSAL 10 TOTAL RETURN | | | **€1,296,900.62** |

**Table 26. Return breakdown of Proposal 11. To implement a smoking cessation plan for smokers with COPD.**

| Return | Return breakdown | | |
| --- | --- | --- | --- |
| Return 11.1. The consumption of health resources associated with smoking would be reduced in COPD patients who quit smoking. | **Indicator** | Number of COPD patients who quit smoking [4,12,13,29,74]. | 581 |
| **Proxy** | Annual savings in healthcare costs of a former smoker compared to a smoker [75]. | €1,454.90 |
| **Deadweight** | Success rate of quitting without any help [4]. | 5.00% |
| **Attribution** | Not applicable. | 0.00% |
|  | **Total (€)** | **€802,354.67** |
| Return 11.2. The loss of labor productivity associated with smoking would be reduced in working COPD patients who quit smoking. | **Indicator** | Number of hours of labor productivity lost that would be avoided in COPD patients who quit smoking [4,12,13,21,29,74]. | 2,088 |
| **Proxy** | Average wage per regular working hour [55]. | €15.48 |
| **Deadweight** | Success rate of quitting without any help [4]. | 5.00% |
| **Attribution** | Not applicable. | 0.00% |
|  | **Total (€)** | **€30,712.06** |
| Return 11.3. The QALYs associated with smoking cessation would increase in COPD patients who quit smoking. | **Indicator** | Number of QALYs gained in COPD patients who quit smoking [4,12,13,29,74]. | 10 |
| **Proxy** | Cost per QALY gained [76]. | €21,000.00 |
| **Deadweight** | Success rate of quitting without any help [4]. | 5.00% |
| **Attribution** | Not applicable. | 0.00% |
|  | **Total (€)** | **€208,757.72** |
| PROPOSAL 11 TOTAL RETURN | | | **€1,041,824.46** |

**Table 27. Return breakdown of Proposal 12. To implement a social evaluation of the patient from a multidimensional point of view.**

| Return | Return breakdown | | |
| --- | --- | --- | --- |
| Return 12.1. The number of consultations to SC would be reduced in patients seen by PalC at home. | **Indicator** | Number of consultations to SC that would be avoided when receiving social care at home compared to traditional care (PC, SC and hospitalization at home)[31,32,34,77]. | 11,603 |
| ***Proxy*** | Cost of a follow-up visit to a specialist [17]. | €88.30 |
| **Deadweight** | Not applicable. | 0.00% |
| **Attribution** | Not applicable. | 0.00% |
|  | **Total (€)** | **€1,024,550.49** |
| Return 12.2. The number of consultations to SC would be reduced in patients who were not yet being treated by PalC. | **Indicator** | Number of consultations to SC that would be avoided when receiving social care at home compared to traditional care (PC and SC) [31,32,77]. | 27,851 |
| ***Proxy*** | Cost of a follow-up visit to a specialist [17]. | €88.30 |
| **Deadweight** | Not applicable. | 0.00% |
| **Attribution** | Not applicable. | 0.00% |
|  | **Total (€)** | **€2,459,320.36** |
| Return 12.3. The number of visits to the emergency room would be reduced in patients treated by PalC at home. | **Indicator** | Number of visits to the emergency room that would be avoided when receiving social care at home compared to traditional care (PC, SC and hospitalization at home) [31,32,34,77]. | 2,190 |
| ***Proxy*** | Cost of visit to the emergency room [17]. | €182.25 |
| **Deadweight** | Not applicable. | 0.00% |
| **Attribution** | Shared by 12.3, 12.4, 13.2, 14.2 y 15.2 | 82.50% |
|  | **Total (€)** | **€69,855.42** |
| Return 12.4. The number of visits to the emergency room would be reduced in patients who were not yet being cared for by PalC. | **Indicator** | Number of visits to the emergency room that would be avoided when receiving social care at home compared to traditional care (PC and SC) [31,32,77]. | 9,879 |
| ***Proxy*** | Cost of visit to the emergency room [17]. | €182.25 |
| **Deadweight** | Not applicable. | 0.00% |
| **Attribution** | Shared by 12.3, 12.4, 13.2, 14.2 y 15.2 | 82.50% |
|  | **Total (€)** | **€315,063.74** |
| Return 12.5. The length of hospital stay would be reduced for patients cared for by PalC at home. | **Indicator** | Number of days of hospitalization that would be avoided when receiving social care at home compared to traditional care (PC, SC and hospitalization at home) [31,32,34,77]. | 88,856 |
| ***Proxy*** | Cost per day of hospitalization of a patient with COPD [78]. | €435.61 |
| **Deadweight** | Not applicable. | 0.00% |
| **Attribution** | Shared by 12.5, 12.6, 13.1, 14.1 y 15.1 | 82.50% |
|  | **Total (€)** | **€6,773,571.32** |
| Return 12.6. The number of days of hospitalization would be reduced in patients who were not yet being cared for by PalC. | **Indicator** | Number of days of hospitalization that would be avoided when receiving social care at home compared to traditional care (PC and SC) [31,32,77]. | 122,592 |
| ***Proxy*** | Cost per day of hospitalization of a patient with COPD [78]. | €435.61 |
| **Deadweight** | Not applicable. | 0.00% |
| **Attribution** | Shared by 12.5, 12.6, 13.1, 14.1 y 15.1 | 82.50% |
|  | **Total (€)** | **€9,345,363.43** |
| Return 12.7. The number of days of hospitalization at home would increase in patients with hospitalization at home. | **Indicator** | Number of days of hospitalization at home that would increase when receiving social care at home compared to traditional care (PC, SC and hospitalization at home) [31,32,34,77,79]. | 56 |
| ***Proxy*** | Cost per day of hospitalization at home [17] | -€159.72 |
| **Deadweight** | Not applicable. | 0.00% |
| **Attribution** | Not applicable. | 0.00% |
|  | **Total (€)** | **-€8,901.75** |
| Return 12.8. Compliance with patients' preferences regarding the place of death would increase. | **Indicator** | Number of patients who would die in the place of preference [31–34,80]. | 12,475 |
| ***Proxy*** | Minimum annual contribution for association of patients with COPD [61]. | €5.00 |
| **Deadweight** | Percentage of PalC patients cared for mainly at home who expressed their preferences for the place of death and saw them fulfilled, regardless of whether or not they received social care [81]. | 25.67% |
| **Attribution** | Not applicable. | 0.00% |
|  | **Total (€)** | **€46,364.70** |
| Return 12.9. The satisfaction of informal caregivers and family members of patients with COPD and indication for PalC with the NHS would improve. | **Indicator** | Number of informal or family caregivers who would improve their satisfaction with the NHS [31–34,80]. | 16,450 |
| ***Proxy*** | Average annual premium per private insurance policyholder [63]. | €797.86 |
| **Deadweight** | Percentage of COPD patients who are already satisfied with the care received at PalC [4]. | 50.00% |
| **Attribution** | Shared by 12.9, 13.5 y 15.7 | 50.00% |
|  | **Total (€)** | **€3,281,148.58** |
| Return 12.10. The burden of informal caregivers of patients with COPD and indication for PalC would be reduced, thanks to the reduction of medical and emergency visits. | **Indicator** | Number of hours of informal care that would be reduced thanks to the care received by PalC [4,31–34,77,80,82]. | 123,463 |
| ***Proxy*** | Cost per hour of informal care [56]. | €7.04 |
| **Deadweight** | Not applicable. | 0.00% |
| **Attribution** | Not applicable. | 0.00% |
|  | **Total (€)** | **€869,178.86** |
| PROPOSAL 12 TOTAL RETURN | | | **€24,175,515.16** |

**Table 28. Return breakdown of Proposal 13. To promote the application of bioethical principles: inform patients and caregivers to facilitate their participation in decision making.**

| Return | Return breakdown | | |
| --- | --- | --- | --- |
| Return 13.1. The number of hospitalizations in patients with COPD and indication for PalC would be reduced. | **Indicator** | Number of hospitalizations that would be avoided by receiving care from a home PalC team [31,32,38,39]. | 21,535 |
| ***Proxy*** | Average cost per hospitalization of a patient with COPD [78]. | €3,397.73 |
| **Deadweight** | Not applicable. | 0.00% |
| **Attribution** | Shared by 12.5, 12.6, 13.1, 14.1 y 15.1 | 65.00% |
|  | **Total (€)** | **€25,609,635.58** |
| Return 13.2. The number of visits to the emergency room in patients with COPD and indication for PalC would be reduced. | **Indicator** | Number of visits to the emergency room that would be avoided by receiving care from a home PalC team [31,32,38,39]. | 58,145 |
| ***Proxy*** | Cost of visit to the emergency room [17]. | €182.25 |
| **Deadweight** | Not applicable. | 0.00% |
| **Attribution** | Shared by 12.3, 12.4, 13.2, 14.2 y 15.2 | 65.00% |
|  | **Total (€)** | **€3,708,804.32** |
| Return 13.3. The satisfaction of patients with COPD and indication of PalC with the care received would improve thanks to better communication and a greater adaptation to their preferences. | **Indicator** | Number of patients with COPD and indication for PalC for whom communication would be improved [31,32,83]. | 5,187 |
| ***Proxy*** | Average annual premium per private insurance policyholder [63]. | €797.86 |
| **Deadweight** | Not applicable. | 0.00% |
| **Attribution** | Shared by 13.3 y 15.5 | 10.00% |
|  | **Total (€)** | **€3,724,628.66** |
| Return 13.4. Anxiety symptoms would be reduced in patients with COPD and an indication for PalC. | **Indicator** | Number of patients with COPD and indication for PalC that would reduce their anxiety symptoms [4,31,32,39]. | 10,768 |
| ***Proxy*** | Cost of a psychoeducational intervention by respiratory nursing [17]. | €59.50 |
| **Deadweight** | Percentage of patients with COPD and indication for PalC who do not present anxiety [4]. | 67.50% |
| **Attribution** | Shared by 13.4, 14.5 y 15.6 | 50.00% |
|  | **Total (€)** | **€104,108.65** |
| Return 13.5. The satisfaction of informal caregivers and relatives of patients with COPD and indication of PalC with the care received would improve thanks to better communication and a greater adaptation to the preferences of the patient. | **Indicator** | Number of patients with COPD and indication for PalC for whom communication would improve [31,32,83]. | 5,187 |
| ***Proxy*** | Average annual premium per private insurance policyholder [63]. | €797.86 |
| **Deadweight** | Not applicable. | 0.00% |
| **Attribution** | Shared by 12.9, 13.5 y 15.7 | 60.00% |
|  | **Total (€)** | **€1,655,390.52** |
| Return 13.6. Anxiety symptoms would be reduced in informal caregivers and relatives of patients with COPD and indication for PalC. | **Indicator** | Number of informal caregivers and relatives of patients with COPD and indication for PalC that would reduce their anxiety symptoms [4,31,32,39] | 10,768 |
| ***Proxy*** | Cost of five sessions of psychological therapy [17]. | €441.51 |
| **Deadweight** | Percentage of informal caregivers and relatives of PalC patients who do not present anxiety. | 51.90% |
| **Attribution** | Shared by 13.6, 14.6 y 15.8 | 50.00% |
|  | **Total (€)** | **€1,143,336.76** |
| PROPOSAL 13 TOTAL RETURN | | | **€35,945,904.49** |

**Table 29. Return breakdown of Proposal 14. To develop a pharmacological and non-pharmacological palliative care plan for end-stage patients.**

| Return | Return breakdown | | |
| --- | --- | --- | --- |
| Return 14.1. The number of hospitalizations would be reduced in patients with COPD and indication for PalC. | **Indicator** | Number of hospitalizations that would be avoided by receiving care from a home PalC team [31,32,38]. | 21,226 |
| ***Proxy*** | Average cost per hospitalization of a patient with COPD [78]. | €3,397.73 |
| **Deadweight** | Percentage of pulmonologists who prescribe opioids for the management of dyspnea in patients with COPD at the end of life according to their usual clinical practice [48]. | 52.90% |
| **Attribution** | Shared by 12.5, 12.6, 13.1, 14.1 y 15.1 | 85.00% |
|  | **Total (€)** | **€5,095,373.35** |
| Return 14.2. The number of visits to the emergency room would be reduced in patients with COPD and indication for PalC. | **Indicator** | Number of visits to the emergency room that would be avoided by receiving care from a home PalC team [31,32,38]. | 57,311 |
| ***Proxy*** | Cost of visit to the emergency room [17]. | €182.25 |
| **Deadweight** | Percentage of pulmonologists who prescribe opioids for the management of dyspnea in patients with COPD at the end of life according to their usual clinical practice [48]. | 52.90% |
| **Attribution** | Shared by 12.3, 12.4, 13.2, 14.2 y 15.2 | 85.00% |
|  | **Total (€)** | **€737,915.33** |
| Return 14.3. The number of patients with COPD and indication for PalC on opioid treatment would increase. | **Indicator** | Number of patients with COPD and indication for PalC who would go on to receive opioids for the management of dyspnea [31,32,38]. | 21,226 |
| ***Proxy*** | Average annual cost of treating dyspnea with opioids per patient in PalC [38,84,85]. | -€72.59 |
| **Deadweight** | Percentage of pulmonologists who prescribe opioids for the management of dyspnea in patients with COPD at the end of life according to their usual clinical practice [48]. | 52.90% |
| **Attribution** | Shared by 14.3 y 15.3 | 50.00% |
|  | **Total (€)** | **-€362,859.90** |
| Return 14.4. The perception of dyspnea control in patients with COPD and indication for PalC would improve. | **Indicator** | Number of patients with COPD and indication for PalC that would improve their perception of control over dyspnea [4,31,32]. | 6,947 |
| ***Proxy*** | Cost of five sessions of psychological therapy [17]. | €441.51 |
| **Deadweight** | Percentage of pulmonologists who prescribe opioids for the management of dyspnea in patients with COPD at the end of life according to their usual clinical practice [48]. | 52.90% |
| **Attribution** | Shared by 14.4 y 15.4 | 50.00% |
|  | **Total (€)** | **€722,301.14** |
| Return 14.5. Symptoms of anxiety and depression in patients with COPD and indication for PalC would be reduced. | **Indicator** | Number of patients with COPD and indication for PalC that would reduce their symptoms of anxiety and / or depression [4,31,32]. | 6,947 |
| ***Proxy*** | Cost of five sessions of psychological therapy [17]. | €441.51 |
| **Deadweight** | Percentage of patients with COPD and indication for PalC who do not present anxiety and / or depression [4]. | 50.00% |
| **Attribution** | Shared by 13.4, 14.5 y 15.6 | 75.00% |
|  | **Total (€)** | **€383,387.02** |
| Return 14.6. Symptoms of anxiety and / or depression in informal caregivers and relatives of patients with COPD and indication for PalC would be reduced. | **Indicator** | Number of hospitalizations that would be avoided by receiving care from a home PalC team [4,31,32]. | 8,654 |
| ***Proxy*** | Average cost per hospitalization of a patient with COPD [17] | €3,397.73 |
| **Deadweight** | Not applicable. | 0.00% |
| **Attribution** | Shared by 12.5, 12.6, 13.1, 14.1 y 15.1 | 85.00% |
|  | **Total (€)** | **€423,642.65** |
| PROPOSAL 14 TOTAL RETURN | | | **€6,999,759.59** |

**Table 30. Return breakdown of Proposal 15. To promote training on the management of palliative respiratory patients, especially in advanced and terminal phases.**

| Return | Return breakdown | | |
| --- | --- | --- | --- |
| Return 15.1. The number of hospitalizations in patients with COPD and indication for PalC would be reduced. | **Indicator** | Number of hospitalizations that would be avoided by receiving care from a home PalC team [4,31,32,38,49]. | 8,654 |
| ***Proxy*** | Average cost per hospitalization of a patient with COPD [78]. | €3,397.73 |
| **Deadweight** | Not applicable. | 0.00% |
| **Attribution** | Shared by 12.5, 12.6, 13.1, 14.1 y 15.1 | 85.00% |
|  | **Total (€)** | **€4,410,607.73** |
| Return 15.2. The number of visits to the emergency room in patients with COPD and indication for PalC would be reduced. | **Indicator** | Number of visits to the emergency room that would be avoided by receiving care from a home PalC team [4,31,32,38,49]. | 23,366 |
| ***Proxy*** | Cost of visit to the emergency room [17]. | €182.25 |
| **Deadweight** | Not applicable. | 0.00% |
| **Attribution** | Shared by 12.3, 12.4, 13.2, 14.2 y 15.2 | 85.00% |
|  | **Total (€)** | **€638,747.12** |
| Return 15.3. The number of patients with COPD and indication for PalC on opioid treatment would increase. | **Indicator** | Number of patients with COPD and indication for PalC who would start receiving opioids for the management of dyspnea [4,31,32,38,49]. | 7,933 |
| ***Proxy*** | Average annual cost of treating dyspnea with opioids per patient in PalC [38,84,85]. | -€72.59 |
| **Deadweight** | Percentage of pulmonologists who prescribe opioids for the management of dyspnea in patients with COPD at the end of life according to their usual clinical practice [48]. | 52.90% |
| **Attribution** | Shared by 14.3 y 15.3 | 50.00% |
|  | **Total (€)** | **-€135,610.63** |
| Return 15.4. The perception of dyspnea control would improve in patients with COPD and indication for PalC. | **Indicator** | Number of patients with COPD and indication for PalC that would improve their perception of control over dyspnea [4,31,32,38,49]. | 2,596 |
| ***Proxy*** | Cost of five sessions of psychological therapy [17]. | €441.51 |
| **Deadweight** | Percentage of pulmonologists who prescribe opioids for the management of dyspnea in patients with COPD at the end of life according to their usual clinical practice [48]. | 52.90% |
| **Attribution** | Shared by 14.4 y 15.4 | 50.00% |
|  | **Total (€)** | **€269,943.62** |
| Return 15.5. The satisfaction of patients with COPD and indication of PalC with the care received would improve thanks to better communication and a greater adaptation to their preferences. | **Indicator** | Number of patients with COPD and indication for PalC for whom communication would improve [4,31,32,38,49]. | 1,939 |
| ***Proxy*** | Average annual premium per private insurance policyholder [63]. | €797.86 |
| **Deadweight** | Not applicable. | 0.00% |
| **Attribution** | Shared by 13.3 y 15.5 | 90.00% |
|  | **Total (€)** | **€154,666.14** |
| Return 15.6. Symptoms of anxiety and / or depression in patients with COPD and indication for PalC would be reduced. | **Indicator** | Number of patients with COPD and indication for PalC that would reduce their symptoms of anxiety and / or depression [4,31,32,38,49]. | 2,596 |
| ***Proxy*** | Cost of five sessions of psychological therapy [17]. | €441.51 |
| **Deadweight** | Percentage of patients with COPD and indication for PalC who do not present anxiety and / or depression [4]. | 50.00% |
| **Attribution** | Shared by 13.4, 14.5 y 15.6 | 75.00% |
|  | **Total (€)** | **€143,282.18** |
| Return 15.7. The satisfaction of informal caregivers and relatives of patients with COPD and indication of PalC with the care received would improve thanks to better communication and a greater adaptation to the preferences of the patient. | **Indicator** | Number of informal caregivers and relatives of patients with COPD and indication for PalC for whom communication would be improved [4,31,32,38,49]. | 1,939 |
| ***Proxy*** | Average annual premium per private insurance policyholder [63]. | €797.86 |
| **Deadweight** | Not applicable. | 0.00% |
| **Attribution** | Shared by 12.9, 13.5 y 15.7 | 90.00% |
|  | **Total (€)** | **€154,666.14** |
| Return 15.8. Symptoms of anxiety and / or depression in informal caregivers and relatives of patients with COPD and indication for PalC would be reduced. | **Indicator** | Number of informal caregivers and relatives of patients with COPD and indication for PalC in whom their symptoms of anxiety and / or depression would be reduced [4,31,32,38,49]. | 4,327 |
| ***Proxy*** | Cost of five sessions of psychological therapy [17]. | €441.51 |
| **Deadweight** | Percentage of informal caregivers or relatives of PalC patients who do not have anxiety and / or depression [4]. | 66.85% |
| **Attribution** | Shared by 13.6, 14.6 y 15.8 | 75.00% |
|  | **Total (€)** | **€158,326.81** |
| PROPOSAL 15 TOTAL RETURN | | | **€5,794,629.10** |

# List of assumptions

The following is a list of the assumptions contemplated in the SROI analysis in which data have not varied in any of the three sensitivity analysis scenarios (worst case scenario, reference scenario and best scenario).

**Table 31. Assumptions included in proposal 1: To ensure spirometry availability in primary care, and to provide training on its use and interpretation.**

| **Assumption** | **Datum** |
| --- | --- |
| Number of health professionals for each theoretical-practical training course in performing and interpreting spirometry. | 15 |
| Percentage of patients with a correct diagnosis out of the total of misdiagnosed patients. | 100% |
| Number of hours needed to go for a medical test or for a visit to SC. | 2 |
| Number of PC nurses per health center or clinic who would receive training in performing and interpreting spirometry. | 2 |

**Table 32. Assumptions included in Proposal 2: To provide training on COPD for primary care professionals.**

| **Assumption** | **Datum** |
| --- | --- |
| Maximum number of participants per training session for PC professionals. | 20 |
| Number of hours of each training course for PC professionals. | 4 |
| Number of experts needed to prepare a training guideline for PC professionals. | 6 |
| Number of training sessions per year for each PC professional. | 2 |
| Percentage of patients misdiagnosed with COPD that could be reduced thanks to optimal use of spirometry. | 50,00% |
| Percentage of patients with a correct diagnosis out of the total of misdiagnosed patients. | 100% |
| Cost of the scientific endorsement of four scientific societies linked to PC. | €12,000.00 |

**Table 33. Assumptions included in Proposal 3: To inform patients and families about the disease and its treatments.**

| **Assumption** | **Datum** |
| --- | --- |
| Number of experts required for the preparation of an information brochure. | 8 |
| Number of hours needed to attend each PC visit. | 1 |
| Number of hours needed for a medical test or for a visit to SC. | 2 |
| Cost of the scientific endorsement of four scientific societies linked to PC. | €12,000.00 |

**Table 34. Assumptions included in Proposal 4: To agree with patients and caregivers on the treatment and management of COPD.**

| **Assumption** | **Datum** |
| --- | --- |
| Number of hours needed for each PC visit. | 1 |

**Table 35. Assumptions included in Proposal 5: To establish coordinated programs between primary and specialized care, and of these with other centers and nursing homes, to enable comprehensive COPD management.**

| **Assumption** | **Datum** |
| --- | --- |
| Level of implementation of HCMN in the NHS. | 50,00% |
| Number of hours needed for a medical test or for a visit to SC. | 2 |

**Table 36. Assumptions included in Proposal 6: To promote the use of a compatible primary/specialized care medical record to identify patients included in chronicity strategies.**

| **Assumption** | **Datum** |
| --- | --- |
| Number of hours needed for each PC visit. | 1 |

**Table 37. Assumptions included in Proposal 7: To provide training on therapeutic adherence.**

| **Assumption** | **Datum** |
| --- | --- |
| Number of COPD patients for each group training session by PC nurses | 8 |
| Number of hours of each group training session by PC nurses | 4 |
| Number of PC nurses for each training course taught by pulmonologists, pharmacy or PC professionals with experience in COPD. | 20 |
| Number of hours of each training course for PC nurses. | 20 |
| Number of hours needed for each PC visit. | 1 |

**Table 38. Assumptions included in Proposal 8. To ensure continuity of care after an exacerbation, in coordination with primary care.**

| **Assumption** | **Datum** |
| --- | --- |
| Percentage of non-hospitalized exacerbated COPD patients referred to PC for post-exacerbation follow-up | 80,00% |
| Percentage of non-hospitalized patients with exacerbated COPD referred to SC for post-exacerbation follow-up. | 20,00% |
| Percentage of hospitalized patients with exacerbated COPD referred to PC for post-exacerbation follow-up. | 20,00% |
| Percentage of hospitalized patients with exacerbated COPD referred to SC for post-exacerbation follow-up. | 80,00% |
| Number of face-to-face visits for post-exacerbation follow-up carried out entirely from PC. | 5 |
| Number of face-to-face visits to PC for post-exacerbation follow-up started in PC and ended in SC. | 1 |
| Number of face-to-face visits in SC for post-exacerbation follow-up started in PC and ended in SC. | 4 |
| Number of face-to-face visits for post-exacerbation follow-up carried out entirely from SC. | 4 |
| Number of face-to-face visits in SC for post-exacerbation follow-up started in SC and ended in PC. | 1 |
| Number of face-to-face visits to PC for post-exacerbation follow-up started in SC and ended in PC. | 4 |
| Number of hours needed for each PC visit. | 1 |
| Number of hours needed for a medical test or for a visit to SC. | 2 |

**Table 39. Assumptions included in Proposal 10: To reconcile and explain medication at hospital discharge.**

| **Assumption** | **Datum** |
| --- | --- |
| Number of experts needed to create leaflets for patients on medication reconciliation. | 8 |
| Number of explanatory visits by the pharmacy at hospital discharge. | 1 |

**Table 40. Assumptions included in Proposal 12: To implement a social evaluation of the patient from a multidimensional point of view.**

| **Assumption** | **Datum** |
| --- | --- |
| Percentage of COPD patients who are already satisfied with the care received at PalC. | 50,00% |
| Number of hours needed for a medical test or for a visit to SC. | 2,00 |

**Table 41. Assumptions included in Proposal 14: To develop a pharmacological and non-pharmacological palliative care plan for end-stage patients.**

| **Assumption** | **Datum** |
| --- | --- |
| Cost of the scientific endorsement of four scientific societies linked to PalC. | €12,000.00 |
| Percentage of COPD patients who are already satisfied with the care received at PalC. | 50,00% |
| Number of hours needed for a medical test or for a visit to SC. | 2,00 |

**Table 42. Assumptions included in Proposal 15: To promote training on the management of palliative respiratory patients, especially in advanced and terminal phases.**

| **Assumption** | **Datum** |
| --- | --- |
| Number of members of the COPD PalC expert group that would provide training in the scientific conferences | 8 |

The following is a list of the assumptions contemplated in the SROI analysis in which data have varied according to the three sensitivity analysis scenarios: worst case scenario, reference scenario, and best scenario.

**Table 43. Sensitivity analysis. Assumption 1.**

| **Assumption included in the calculation (return)** | **Reference case** | **Worst-case scenario** | **Best-case scenario** |
| --- | --- | --- | --- |
| **Percentage of diagnosis-related referrals from PC to pulmonology in COPD patients.** | **30.00%** | **10.00%** | **50.00%** |
| **Proposals and returns that include this assumption** | | | |
| Area of Diagnosis: Proposal 1. To ensure spirometry availability in primary care, and to provide training on its use and interpretation.   - Return 1.1. The number of referrals from PC to pulmonology would be reduced. | | | |

**Table 44. Sensitivity analysis. Assumption 2.**

| **Assumption included in the calculation (return)** | **Reference case** | **Worst-case scenario** | **Best-case scenario** |
| --- | --- | --- | --- |
| **Percentage of patients misdiagnosed with COPD that could be reduced thanks to optimal use of spirometry.** | **50.00%** | **40.00%** | **60.00%** |
| **Proposals and returns that include this assumption** | | | |
| Area of Diagnosis: Proposal 1. To ensure spirometry availability in primary care, and to provide training on its use and interpretation.   - Return 1.2. The number of misdiagnoses of COPD in PC would be reduced.   Area of Diagnosis: Proposal 2. To provide training on COPD for primary care professionals.   - Return 2.1. The number of misdiagnoses of COPD in PC would be reduced. | | | |

**Table 45. Sensitivity analysis. Assumption 3.**

| **Assumption included in the calculation (return)** | **Reference case** | **Worst-case scenario** | **Best-case scenario** |
| --- | --- | --- | --- |
| **Percentage of PC professionals that would participate in updating courses.** | **30.00%** | **10.00%** | **50.00%** |
| **Proposals and returns that include this assumption** | | | |
| Area of Diagnosis: Proposal 2. To provide training on COPD for primary care professionals.   - Return 2.2. The healthcare costs associated with the inappropriate use of inhaled corticosteroids in COPD patients would be reduced. | | | |

**Table 46. Sensitivity analysis. Assumption 4.**

| **Assumption included in the calculation (return)** | **Reference case** | **Worst-case scenario** | **Best-case scenario** |
| --- | --- | --- | --- |
| **Percentage of improvement in adherence thanks to joint decision-making.** | **10.00%** | **0.00%** | **20.00%** |
| **Proposals and returns that include this assumption** | | | |
| Area of Risk stratification. Low-risk level: Proposal 4. To agree with patients and caregivers on the treatment and management of COPD.   - Return 4.1. Adherence to treatment of low-risk COPD patients would improve. | | | |

**Table 47. Sensitivity analysis. Assumption 5.**

| **Assumption included in the calculation (return)** | **Reference case** | **Worst-case scenario** | **Best-case scenario** |
| --- | --- | --- | --- |
| **Annual mean savings in direct healthcare costs per patient with COPD adherent to treatment (vs. non-adherent).** | **€444.58** | **€46.51** | **€650.11** |
| **Proposals and returns that include this assumption** | | | |
| Area of Risk stratification. Low-risk level: Proposal 4. To agree with patients and caregivers on the treatment and management of COPD.   - Return 4.1. Adherence to treatment of low-risk COPD patients would improve.   Area of Management of exacerbations: Proposal 7. To provide training on therapeutic adherence.   - Return 7.1. Direct healthcare costs for COPD patients would be reduced, thanks to improved adherence. | | | |

**Table 48. Sensitivity analysis. Assumption 6.**

| **Assumption included in the calculation (return)** | **Reference case** | **Worst-case scenario** | **Best-case scenario** |
| --- | --- | --- | --- |
| **Percentage of improvement in knowledge of the disease thanks to joint decision-making.** | **10.00%** | **0.00%** | **20.00%** |
| **Proposals and returns that include this assumption** | | | |
| Area of Risk stratification. Low-risk level: Proposal 4. To agree with patients and caregivers on the treatment and management of COPD.   - Return 4.2. Knowledge of the disease in low-risk COPD patients would improve. | | | |

**Table 49. Sensitivity analysis. Assumption 7.**

| **Assumption included in the calculation (return)** | **Reference case** | **Worst-case scenario** | **Best-case scenario** |
| --- | --- | --- | --- |
| **Percentage of improvement in perceived health status thanks to joint decision-making.** | **10.00%** | **0.00%** | **20.00%** |
| **Proposals and returns that include this assumption** | | | |
| Area of Risk stratification. Low-risk level: Proposal 4. To agree with patients and caregivers on the treatment and management of COPD.   - Return 4.3. The perceived health status of low-risk COPD patients would improve. | | | |

**Table 50. Sensitivity analysis. Assumption 8.**

| **Assumption included in the calculation (return)** | **Reference case** | **Worst-case scenario** | **Best-case scenario** |
| --- | --- | --- | --- |
| **Number of informal caregiving hours per year that would be reduced thanks to the improvement of joint decision-making.** | **12** | **6** | **18** |
| **Proposals and returns that include this assumption** | | | |
| Area of Risk stratification. Low-risk level: Proposal 4. To agree with patients and caregivers on the treatment and management of COPD.   - Return 4.4. It would reduce the burden on informal caregivers of low-risk COPD patients, thanks to improved joint decision-making. | | | |

**Table 51. Sensitivity analysis. Assumption 9.**

| **Assumption included in the calculation (return)** | **Reference case** | **Worst-case scenario** | **Best-case scenario** |
| --- | --- | --- | --- |
| **Percentage of COPD patients that would improve their satisfaction with the NHS thanks to integrated attention programs.** | **10.00%** | **0.00%** | **20.00%** |
| **Proposals and returns that include this assumption** | | | |
| Area of Risk stratification. Moderate-high risk level: Proposal 5. To establish coordinated programs between primary and specialized care, and of these with other centers and nursing homes, to enable comprehensive COPD management.   - Return 5.3. The satisfaction of resident COPD patients with a moderate-high risk level would improve thanks to coordinated programs between PC-SC and the centers-nursing homes. | | | |

**Table 52. Sensitivity analysis. Assumption 10.**

| **Assumption included in the calculation (return)** | **Reference case** | **Worst-case scenario** | **Best-case scenario** |
| --- | --- | --- | --- |
| **Percentage of informal caregivers of COPD patients that would improve their satisfaction with the NHS thanks to integrated attention programs.** | **10.00%** | **0.00%** | **20.00%** |
| **Proposals and returns that include this assumption** | | | |
| Area of Risk stratification. Moderate-high risk level: Proposal 5. To establish coordinated programs between primary and specialized care, and of these with other centers and nursing homes, to enable comprehensive COPD management.   - Return 5.5. The satisfaction of informal caregivers of resident COPD patients with a moderate-high risk level would be improved, by having coordinated care between PC-SC and the centers-nursing homes. | | | |

**Table 53. Sensitivity analysis. Assumption 11.**

| **Assumption included in the calculation (return)** | **Reference case** | **Worst-case scenario** | **Best-case scenario** |
| --- | --- | --- | --- |
| **Percentage of COPD patients that would improve their leisure life thanks to their correct identification in chronicity strategies.** | **10.00%** | **0.00%** | **20.00%** |
| **Proposals and returns that include this assumption** | | | |
| Area of Risk stratification. Moderate-high risk level: Proposal 6. To promote the use of a compatible primary/specialized care medical record to identify patients included in chronicity strategies.   - Return 6.2. The leisure life of COPD patients with a moderate-high risk level would improve thanks to a correct identification in chronicity strategies and to having direct recommendations adapted to their health status. | | | |

**Table 54. Sensitivity analysis. Assumption 12.**

| **Assumption included in the calculation (return)** | **Reference case** | **Worst-case scenario** | **Best-case scenario** |
| --- | --- | --- | --- |
| **Percentage of COPD patients that would improve their satisfaction with the NHS thanks to their correct identification in chronicity strategies.** | **10.00%** | **0.00%** | **20.00%** |
| **Proposals and returns that include this assumption** | | | |
| Area of Risk stratification. Moderate-high risk level: Proposal 6. To promote the use of a compatible primary/specialized care medical record to identify patients included in chronicity strategies.   - Return 6.3. The satisfaction of COPD patients with a moderate-high risk level with the NHS would improve, thanks to a correct identification in chronicity strategies. | | | |

**Table 55. Sensitivity analysis. Assumption 13.**

| **Assumption included in the calculation (return)** | **Reference case** | **Worst-case scenario** | **Best-case scenario** |
| --- | --- | --- | --- |
| **Percentage of informal caregivers of COPD patients that would improve their satisfaction with the NHS thanks to the correct identification of COPD patients in chronicity strategies.** | **10.00%** | **0.00%** | **20.00%** |
| **Proposals and returns that include this assumption** | | | |
| Area of Risk stratification. Moderate-high risk level: Proposal 6. To promote the use of a compatible primary/specialized care medical record to identify patients included in chronicity strategies.   - Return 6.4. The satisfaction of informal caregivers of COPD patients with a moderate-high risk level with the NHS would improve, thanks to a correct identification in the chronicity strategies. | | | |

**Table 56. Sensitivity analysis. Assumption 14.**

| **Assumption included in the calculation (investment and return)** | **Reference case** | **Worst-case scenario** | **Best-case scenario** |
| --- | --- | --- | --- |
| **Number of individual PC nurses visits per patient for adherence training.** | **1.5** | **2** | **1** |
| **Proposals in which the investment includes this assumption** | | | |
| Area of Management of exacerbations: Proposal 7. To provide training on therapeutic adherence. | | | |
| **Proposals and returns that include this assumption** | | | |
| Area of Management of exacerbations: Proposal 7. To provide training on therapeutic adherence.   - Return 7.3. Loss of labor productivity would occur as a consequence of attending educational sessions / visits. - Return 7.5. The burden of informal caregivers of COPD patients would increase as a result of accompanying them to educational sessions / visits. | | | |

**Table 57. Sensitivity analysis. Assumption 15.**

| **Assumption included in the calculation (return)** | **Reference case** | **Worst-case scenario** | **Best-case scenario** |
| --- | --- | --- | --- |
| **Percentage of informal caregivers of COPD patients that would improve their satisfaction with the NHS thanks to education sessions with nursing professionals.** | **50.00%** | **25.00%** | **75.00%** |
| **Proposals and returns that include this assumption** | | | |
| Area of Management of exacerbations: Proposal 7. To provide training on therapeutic adherence.   - Return 7.4. The satisfaction of informal caregivers of COPD patients with the NHS would improve. | | | |

**Table 58. Sensitivity analysis. Assumption 16.**

| **Assumption included in the calculation (investment)** | **Reference case** | **Worst-case scenario** | **Best-case scenario** |
| --- | --- | --- | --- |
| **Cost / smoker per pharmacological intervention to quit smoking.** | **€254.04** | **€371.00** | **€106.99** |
| **Proposals in which the investment includes this assumption** | | | |
| Area of Management of stable COPD. Follow-up: Proposal 11. To implement a smoking cessation plan for smokers with COPD. | | | |

**Table 59. Sensitivity analysis. Assumption 17.**

| **Assumption included in the calculation (return)** | **Reference case** | **Worst-case scenario** | **Best-case scenario** |
| --- | --- | --- | --- |
| **Success rate of quitting smoking without any help.** | **5.00%** | **10.00%** | **0.00%** |
| **Proposals and returns that include this assumption** | | | |
| Area of Management of stable COPD. Follow-up: Proposal 11. To implement a smoking cessation plan for smokers with COPD.   - Return 11.1. The consumption of health resources associated with smoking would be reduced in COPD patients who quit smoking. - Return 11.2. The loss of labor productivity associated with smoking would be reduced in working COPD patients who quit smoking. - Return 11.3. The QALYs associated with smoking cessation would increase in COPD patients who quit smoking. | | | |

**Table 60. Sensitivity analysis. Assumption 18.**

| **Assumption included in the calculation (return)[[1]](#footnote-1)** | **Reference case** | **Worst-case scenario** | **Best-case scenario** |
| --- | --- | --- | --- |
| **Additional success rate of a pharmacological intervention to quit smoking over routine clinical practice.**  **See footnote below.* | **0.185%** | **0.150%** | **0.017%** |
| **Proposals and returns that include this assumption** | | | |
| Area of Management of stable COPD. Follow-up: Proposal 11. To implement a smoking cessation plan for smokers with COPD.   - Return 11.1. The consumption of health resources associated with smoking would be reduced in COPD patients who quit smoking. - Return 11.2. The loss of labor productivity associated with smoking would be reduced in working COPD patients who quit smoking. - Return 11.3. The QALYs associated with smoking cessation would increase in COPD patients who quit smoking. | | | |

**Table 61. Sensitivity analysis. Assumption 19.**

| **Assumption included in the calculation (return)** | **Reference case** | **Worst-case scenario** | **Best-case scenario** |
| --- | --- | --- | --- |
| **Days of work absenteeism due to the smoking habit.** | **6** | **2** | **10** |
| **Proposals and returns that include this assumption** | | | |
| Area of Management of stable COPD. Follow-up: Proposal 11. To implement a smoking cessation plan for smokers with COPD.   - Return 11.2. The loss of labor productivity associated with smoking would be reduced in working COPD patients who quit smoking. | | | |

**Table 62. Sensitivity analysis. Assumption 20.**

| **Assumption included in the calculation (return)** | **Reference case** | **Worst-case scenario** | **Best-case scenario** |
| --- | --- | --- | --- |
| **Cost per QALY gained.** | **€21.000.00** | **€11.000.00** | **€30.000.00** |
| **Proposals and returns that include this assumption** | | | |
| Area of Management of stable COPD. Follow-up: Proposal 11. To implement a smoking cessation plan for smokers with COPD.   - Return 11.3. The QALYs associated with smoking cessation would increase in COPD patients who quit smoking. | | | |

**Table 63. Sensitivity analysis. Assumption 21.**

| **Assumption included in the calculation (investment)** | **Reference case** | **Worst-case scenario** | **Best-case scenario** |
| --- | --- | --- | --- |
| **Number of weekly follow-up visits for patients with indication for "complex" or "very complex" home PalC".** | **2** | **3** | **1** |
| **Proposals in which the investment includes this assumption** | | | |
| Area of Management of stable COPD. Palliative care: Proposal 12. To implement a social evaluation of the patient from a multidimensional point of view.  Area of Management of stable COPD. Palliative care: Proposal 13. To promote the application of bioethical principles: inform patients and caregivers to facilitate their participation in decision making. | | | |

**Table 64. Sensitivity analysis. Assumption 22.**

| **Assumption included in the calculation (investment)[[2]](#footnote-2)** | **Reference case** | **Worst-case scenario** | **Best-case scenario** |
| --- | --- | --- | --- |
| **Percentage of patients with indication for PalC classified as "not complex".**  **See footnote below.* | **50.00%** | **25.00%** | **75.00%** |
| **Proposals in which the investment includes this assumption** | | | |
| Area of Management of stable COPD. Palliative care: Proposal 12. To implement a social evaluation of the patient from a multidimensional point of view.  Area of Management of stable COPD. Palliative care: Proposal 13. To promote the application of bioethical principles: inform patients and caregivers to facilitate their participation in decision making. | | | |

**Table 65. Sensitivity analysis. Assumption 23.**

| **Assumption included in the calculation (investment)[[3]](#footnote-3)** | **Reference case** | **Worst-case scenario** | **Best-case scenario** |
| --- | --- | --- | --- |
| **Percentage of patients with indication for PalC classified as "complex" or "very complex".**  **See footnote below.* | **50.00%** | **75.00%** | **25.00%** |
| **Proposals in which the investment includes this assumption** | | | |
| Area of Management of stable COPD. Palliative care: Proposal 12. To implement a social evaluation of the patient from a multidimensional point of view.  Area of Management of stable COPD. Palliative care: Proposal 13. To promote the application of bioethical principles: inform patients and caregivers to facilitate their participation in decision making. | | | |

**Table 66. Sensitivity analysis. Assumption 24.**

| **Assumption included in the calculation (return)** | **Reference case** | **Worst-case scenario** | **Best-case scenario** |
| --- | --- | --- | --- |
| **Percentage of patients with COPD and indication for PalC that would reduce their anxiety symptoms after an Anticipatory Care Plan session with a nursing professional.** | **50.00%** | **25.00%** | **75.00%** |
| **Proposals and returns that include this assumption** | | | |
| Area of Management of stable COPD. Palliative care: Proposal 13. To promote the application of bioethical principles: inform patients and caregivers to facilitate their participation in decision making.   - Return 13.4. Anxiety symptoms would be reduced in patients with COPD and an indication for PalC. | | | |

**Table 67. Sensitivity analysis. Assumption 25.**

| **Assumption included in the calculation (return)** | **Reference case** | **Worst-case scenario** | **Best-case scenario** |
| --- | --- | --- | --- |
| **Percentage of patients with COPD and indication for PalC who do not present anxiety.** | **67.50%** | **90.00%** | **45.00%** |
| **Proposals and returns that include this assumption** | | | |
| Area of Management of stable COPD. Palliative care: Proposal 13. To promote the application of bioethical principles: inform patients and caregivers to facilitate their participation in decision making.   - Return 13.4. Anxiety symptoms would be reduced in patients with COPD and an indication for PalC. | | | |

**Table 68. Sensitivity analysis. Assumption 26.**

| **Assumption included in the calculation (return)** | **Reference case** | **Worst-case scenario** | **Best-case scenario** |
| --- | --- | --- | --- |
| **Percentage informal caregivers of patients with COPD and indication for PalC that would reduce their anxiety symptoms after an Anticipatory Care Plan session with a nursing professional.** | **50.00%** | **25.00%** | **75.00%** |
| **Proposals and returns that include this assumption** | | | |
| Area of Management of stable COPD. Palliative care: Proposal 13. To promote the application of bioethical principles: inform patients and caregivers to facilitate their participation in decision making.   - Return 13.6. Anxiety symptoms would be reduced in informal caregivers and relatives of patients with COPD and indication for PalC. | | | |

**Table 69. Sensitivity analysis. Assumption 27.**

| **Assumption included in the calculation (return)** | **Reference case** | **Worst-case scenario** | **Best-case scenario** |
| --- | --- | --- | --- |
| **Percentage of patients with COPD that would improve their perception of dyspnea control.** | **30.00%** | **10.00%** | **50.00%** |
| **Proposals and returns that include this assumption** | | | |
| Area of Management of stable COPD. Palliative care: Proposal 14. To develop a pharmacological and non-pharmacological palliative care plan for end-stage patients.   - Return 14.4. The perception of dyspnea control in patients with COPD and indication for PalC would improve. | | | |
| Area of Management of stable COPD. Palliative care: Proposal 15. To promote training on the management of palliative respiratory patients, especially in advanced and terminal phases.   - Return 15.4. The perception of dyspnea control would improve in patients with COPD and indication for PalC. | | | |

**Table 70. Sensitivity analysis. Assumption 28.**

| **Assumption included in the calculation (return)** | **Reference case** | **Worst-case scenario** | **Best-case scenario** |
| --- | --- | --- | --- |
| **Percentage of patients with COPD and indication for PalC that would reduce their symptoms of anxiety and / or depression.** | **30.00%** | **10.00%** | **50.00%** |
| **Proposals and returns that include this assumption** | | | |
| Area of Management of stable COPD. Palliative care: Proposal 14. To develop a pharmacological and non-pharmacological palliative care plan for end-stage patients.   - Return 14.5. Symptoms of anxiety and depression in patients with COPD and indication for PalC would be reduced. | | | |
| Area of Management of stable COPD. Palliative care: Proposal 15. To promote training on the management of palliative respiratory patients, especially in advanced and terminal phases.   - Return 15.6. Symptoms of anxiety and / or depression in patients with COPD and indication for PalC would be reduced. | | | |

**Table 71. Sensitivity analysis. Assumption 29.**

| **Assumption included in the calculation (return)** | **Reference case** | **Worst-case scenario** | **Best-case scenario** |
| --- | --- | --- | --- |
| **Percentage of patients with COPD and indication for PalC who do not present anxiety and / or depression.** | **50.00%** | **75.00%** | **25.00%** |
| **Proposals and returns that include this assumption** | | | |
| Area of Management of stable COPD. Palliative care: Proposal 14. To develop a pharmacological and non-pharmacological palliative care plan for end-stage patients.   - Return 14.5. Symptoms of anxiety and depression in patients with COPD and indication for PalC would be reduced. | | | |
| Area of Management of stable COPD. Palliative care: Proposal 15. To promote training on the management of palliative respiratory patients, especially in advanced and terminal phases.   - Return 15.6. Symptoms of anxiety and / or depression in patients with COPD and indication for PalC would be reduced. | | | |

**Table 72. Sensitivity analysis. Assumption 30.**

| **Assumption included in the calculation (return)** | **Reference case** | **Worst-case scenario** | **Best-case scenario** |
| --- | --- | --- | --- |
| **Percentage of informal caregivers of patients with COPD and indication for PalC that would reduce their symptoms of anxiety and / or depression.** | **50.00%** | **25.00%** | **75.00%** |
| **Proposals and returns that include this assumption** | | | |
| Area of Management of stable COPD. Palliative care: Proposal 14. To develop a pharmacological and non-pharmacological palliative care plan for end-stage patients.   - Return 14.6. Symptoms of anxiety and / or depression in informal caregivers and relatives of patients with COPD and indication for PalC would be reduced. | | | |
| Area of Management of stable COPD. Palliative care: Proposal 15. To promote training on the management of palliative respiratory patients, especially in advanced and terminal phases.   - Return 15.8. Symptoms of anxiety and / or depression in informal caregivers and relatives of patients with COPD and indication for PalC would be reduced. | | | |

**Table 73. Sensitivity analysis. Assumption 31.**

| **Assumption included in the calculation (return)** | **Reference case** | **Worst-case scenario** | **Best-case scenario** |
| --- | --- | --- | --- |
| **Percentage of informal caregivers or relatives of PalC patients who do not have anxiety and / or depression.** | **66.85%** | **81.80%** | **51.90%** |
| **Proposals and returns that include this assumption** | | | |
| Area of Management of stable COPD. Palliative care: Proposal 14. To develop a pharmacological and non-pharmacological palliative care plan for end-stage patients.   - Return 14.6. Symptoms of anxiety and / or depression in informal caregivers and relatives of patients with COPD and indication for PalC would be reduced. | | | |
| Area of Management of stable COPD. Palliative care: Proposal 15. To promote training on the management of palliative respiratory patients, especially in advanced and terminal phases.   - Return 15.8. Symptoms of anxiety and / or depression in informal caregivers and relatives of patients with COPD and indication for PalC would be reduced. | | | |

**Table 74. Sensitivity analysis. Assumption 32.**

| **Assumption included in the calculation (return)** | **Reference case** | **Worst-case scenario** | **Best-case scenario** |
| --- | --- | --- | --- |
| **Percentage of healthcare professionals caring for patients with COPD susceptible of or with an indication for PalC that would receive training in PalC.** | **53.80%** | **29.50%** | **89.90%** |
| **Proposals and returns that include this assumption** | | | |
| Area of Management of stable COPD. Palliative care: Proposal 15. To promote training on the management of palliative respiratory patients, especially in advanced and terminal phases.   - Return 15.1. The number of hospitalizations in patients with COPD and indication for PalC would be reduced. - Return 15.2. The number of visits to the emergency room in patients with COPD and indication for PalC would be reduced. - Return 15.3. The number of patients with COPD and indication for PalC on opioid treatment would increase. - Return 15.4. The perception of dyspnea control would improve in patients with COPD and indication for PalC. - Return 15.5. The satisfaction of patients with COPD and indication of PalC with the care received would improve thanks to better communication and a greater adaptation to their preferences. - Return 15.6. Symptoms of anxiety and / or depression in patients with COPD and indication for PalC would be reduced. - Return 15.7. The satisfaction of informal caregivers and relatives of patients with COPD and indication of PalC with the care received would improve thanks to better communication and a greater adaptation to the preferences of the patient. - Return 15.8. Symptoms of anxiety and / or depression in informal caregivers and relatives of patients with COPD and indication for PalC would be reduced. | | | |

**Table 75. Sensitivity analysis. Assumption 33.**

| **Assumption included in the calculation (return)** | **Reference case** | **Worst-case scenario** | **Best-case scenario** |
| --- | --- | --- | --- |
| **Percentage of patients with COPD and indication for PalC that would improve their communication with a healthcare professional thanks to training sessions.** | **22.40%** | **11.20%** | **46.35%** |
| **Proposals and returns that include this assumption** | | | |
| Area of Management of stable COPD. Palliative care: Proposal 15. To promote training on the management of palliative respiratory patients, especially in advanced and terminal phases.   - Return 15.5. The satisfaction of patients with COPD and indication of PalC with the care received would improve thanks to better communication and a greater adaptation to their preferences. - Return 15.7. The satisfaction of informal caregivers and relatives of patients with COPD and indication of PalC with the care received would improve thanks to better communication and a greater adaptation to the preferences of the patient. | | | |

# Table index

[Table 1. Investment breakdown of Proposal 1. To ensure spirometry availability in primary care, and to provide training on its use and interpretation. 1](#_Toc94854450)

[Table 2. Breakdown of the investment of Proposal 2. To provide training on COPD for primary care professionals. 2](#_Toc94854451)

[Table 3. Breakdown of the investment of Proposal 3. To inform patients and families about the disease and its treatments. 3](#_Toc94854452)

[Table 4. Breakdown of the investment of Proposal 4. To agree with patients and caregivers on the treatment and management of COPD. 4](#_Toc94854453)

[Table 5. Breakdown of the investment of Proposal 5. To establish coordinated programs between primary and specialized care, and of these with other centers and nursing homes, to enable comprehensive COPD management. 5](#_Toc94854454)

[Table 6. breakdown of the investment of Proposal 6. To promote the use of a compatible primary/specialized care medical record to identify patients included in chronicity strategies. 6](#_Toc94854455)

[Table 7. Breakdown of the investment of Proposal 7. To provide training on therapeutic adherence. 7](#_Toc94854456)

[Table 8. breakdown of the investment of Proposal 8. To ensure continuity of care after an exacerbation, in coordination with primary care. 8](#_Toc94854457)

[Table 9. Breakdown of the investment of Proposal 9. To ensure availability of adequate resources for exacerbations that require hospitalization. 9](#_Toc94854458)

[Table 10. Breakdown of the investment of Proposal 10. To reconcile and explain medication at hospital discharge. 10](#_Toc94854459)

[Table 11. Breakdown of the investment of Proposal 11. To implement a smoking cessation plan for smokers with COPD. 11](#_Toc94854460)

[Table 12. Breakdown of the investment of Proposal 12. To implement a social evaluation of the patient from a multidimensional point of view. 11](#_Toc94854461)

[Table 13. Breakdown of the investment of Proposal 13. To promote the application of bioethical principles: inform patients and caregivers to facilitate their participation in decision making. 13](#_Toc94854462)

[Table 14. Breakdown of the investment of Proposal 14. To develop a pharmacological and non-pharmacological palliative care plan for end-stage patients. 14](#_Toc94854463)

[Table 15. Breakdown of the investment of Proposal 15. To promote training on the management of palliative respiratory patients, especially in advanced and terminal phases. 15](#_Toc94854464)

[Table 16. Return breakdown of Proposal 1. To ensure spirometry availability in primary care, and to provide training on its use and interpretation. 16](#_Toc94854465)

[Table 17. Return breakdown of Proposal 2. To provide training on COPD for primary care professionals. 17](#_Toc94854466)

[Table 18. Return breakdown of Proposal 3. To inform patients and families about the disease and its treatments. 18](#_Toc94854467)

[Table 19. Return breakdown of Proposal 4. To agree with patients and caregivers on the treatment and management of COPD. 19](#_Toc94854468)

[Table 20. Return breakdown of Proposal 5. To establish coordinated programs between primary and specialized care, and of these with other centers and nursing homes, to enable comprehensive COPD management. 21](#_Toc94854469)

[Table 21. Return breakdown of Proposal 6. To promote the use of a compatible primary/specialized care medical record to identify patients included in chronicity strategies. 22](#_Toc94854470)

[Table 22. Return breakdown of Proposal 7. To provide training on therapeutic adherence. 24](#_Toc94854471)

[Table 23. Return breakdown Proposal 8. To ensure continuity of care after an exacerbation, in coordination with primary care. 25](#_Toc94854472)

[Table 24. Return breakdown of Proposal 9. To ensure availability of adequate resources for exacerbations that require hospitalization. 28](#_Toc94854473)

[Table 25. Return breakdown of Proposal 10. To reconcile and explain medication at hospital discharge. 28](#_Toc94854474)

[Table 26. Return breakdown of Proposal 11. To implement a smoking cessation plan for smokers with COPD. 29](#_Toc94854475)

[Table 27. Return breakdown of Proposal 12. To implement a social evaluation of the patient from a multidimensional point of view. 30](#_Toc94854476)

[Table 28. Return breakdown of Proposal 13. To promote the application of bioethical principles: inform patients and caregivers to facilitate their participation in decision making. 32](#_Toc94854477)

[Table 29. Return breakdown of Proposal 14. To develop a pharmacological and non-pharmacological palliative care plan for end-stage patients. 34](#_Toc94854478)

[Table 30. Return breakdown of Proposal 15. To promote training on the management of palliative respiratory patients, especially in advanced and terminal phases. 36](#_Toc94854479)

[Table 31. Assumptions included in proposal 1: To ensure spirometry availability in primary care, and to provide training on its use and interpretation. 39](#_Toc94854480)

[Table 32. Assumptions included in Proposal 2: To provide training on COPD for primary care professionals. 39](#_Toc94854481)

[Table 33. Assumptions included in Proposal 3: To inform patients and families about the disease and its treatments. 39](#_Toc94854482)

[Table 34. Assumptions included in Proposal 4: To agree with patients and caregivers on the treatment and management of COPD. 39](#_Toc94854483)

[Table 35. Assumptions included in Proposal 5: To establish coordinated programs between primary and specialized care, and of these with other centers and nursing homes, to enable comprehensive COPD management. 40](#_Toc94854484)

[Table 36. Assumptions included in Proposal 6: To promote the use of a compatible primary/specialized care medical record to identify patients included in chronicity strategies. 40](#_Toc94854485)

[Table 37. Assumptions included in Proposal 7: To provide training on therapeutic adherence. 40](#_Toc94854486)

[Table 38. Assumptions included in Proposal 8. To ensure continuity of care after an exacerbation, in coordination with primary care. 40](#_Toc94854487)

[Table 39. Assumptions included in Proposal 10: To reconcile and explain medication at hospital discharge. 41](#_Toc94854488)

[Table 40. Assumptions included in Proposal 12: To implement a social evaluation of the patient from a multidimensional point of view. 41](#_Toc94854489)

[Table 41. Assumptions included in Proposal 14: To develop a pharmacological and non-pharmacological palliative care plan for end-stage patients. 41](#_Toc94854490)

[Table 42. Assumptions included in Proposal 15: To promote training on the management of palliative respiratory patients, especially in advanced and terminal phases. 41](#_Toc94854491)

[Table 43. Sensitivity analysis. Assumption 1. 41](#_Toc94854492)

[Table 44. Sensitivity analysis. Assumption 2. 42](#_Toc94854493)

[Table 45. Sensitivity analysis. Assumption 3. 42](#_Toc94854494)

[Table 46. Sensitivity analysis. Assumption 4. 42](#_Toc94854495)

[Table 47. Sensitivity analysis. Assumption 5. 43](#_Toc94854496)

[Table 48. Sensitivity analysis. Assumption 6. 43](#_Toc94854497)

[Table 49. Sensitivity analysis. Assumption 7. 43](#_Toc94854498)

[Table 50. Sensitivity analysis. Assumption 8. 44](#_Toc94854499)

[Table 51. Sensitivity analysis. Assumption 9. 44](#_Toc94854500)

[Table 52. Sensitivity analysis. Assumption 10. 44](#_Toc94854501)

[Table 53. Sensitivity analysis. Assumption 11. 45](#_Toc94854502)

[Table 54. Sensitivity analysis. Assumption 12. 45](#_Toc94854503)

[Table 55. Sensitivity analysis. Assumption 13. 45](#_Toc94854504)

[Table 56. Sensitivity analysis. Assumption 14. 46](#_Toc94854505)

[Table 57. Sensitivity analysis. Assumption 15. 46](#_Toc94854506)

[Table 58. Sensitivity analysis. Assumption 16. 46](#_Toc94854507)

[Table 59. Sensitivity analysis. Assumption 17. 47](#_Toc94854508)

[Table 60. Sensitivity analysis. Assumption 18. 47](#_Toc94854509)

[Table 61. Sensitivity analysis. Assumption 19. 48](#_Toc94854510)

[Table 62. Sensitivity analysis. Assumption 20. 48](#_Toc94854511)

[Table 63. Sensitivity analysis. Assumption 21. 48](#_Toc94854512)

[Table 64. Sensitivity analysis. Assumption 22. 49](#_Toc94854513)

[Table 65. Sensitivity analysis. Assumption 23. 49](#_Toc94854514)

[Table 66. Sensitivity analysis. Assumption 24. 49](#_Toc94854515)

[Table 67. Sensitivity analysis. Assumption 25. 50](#_Toc94854516)

[Table 68. Sensitivity analysis. Assumption 26. 50](#_Toc94854517)

[Table 69. Sensitivity analysis. Assumption 27. 50](#_Toc94854518)

[Table 70. Sensitivity analysis. Assumption 28. 51](#_Toc94854519)

[Table 71. Sensitivity analysis. Assumption 29. 51](#_Toc94854520)

[Table 72. Sensitivity analysis. Assumption 30. 52](#_Toc94854521)

[Table 73. Sensitivity analysis. Assumption 31. 52](#_Toc94854522)

[Table 74. Sensitivity analysis. Assumption 32. 53](#_Toc94854523)

[Table 75. Sensitivity analysis. Assumption 33. 53](#_Toc94854524)

# References

1. Ministerio de Sanidad, Consumo y Bienestar Social. Consulta Interactiva del SNS. Sistema de Información de Atención Primaria (SIAP). Recursos. Zonas básicas y centros 2018 [Internet]. 2019 [cited 2019 Sep 30];Available from: https://pestadistico.inteligenciadegestion.mscbs.es/publicoSNS/comun/Informe.aspx?IdNodo=6411

2. Márquez-Martín E, Soriano JB, Rubio MC, Lopez-Campos JL, 3E project. Differences in the use of spirometry between rural and urban primary care centers in Spain. Int J Chron Obstruct Pulmon Dis 2015;10:1633–9.

3. Proyecto SROI-EPOC. Precio de mercado. 2020.

4. Proyecto SROI-EPOC. Asunción. 2020.

5. López-Campos JL, Soriano JB, Calle M, 3E Project. Inter-regional changes in the performance and interpretation of spirometry in Spain: 3E study. Arch Bronconeumol 2014;50(11):475–83.

6. Represas-Represas C, Botana-Rial M, Leiro-Fernández V, González-Silva AI, García-Martínez A, Fernández-Villar A. Short- and long-term effectiveness of a supervised training program in spirometry use for primary care professionals. Arch Bronconeumol 2013;49(9):378–82.

7. Organización Médica Colegial: Fundación para la formación. Reglamento de cursos y acciones formativas [Internet]. 2016 [cited 2018 Mar 22];Available from: http://www.ffomc.org/sites/default/files/ReglamentoVersionFinal.pdf

8. Consejería de Sanidad. Comunidad de Madrid. Comisión de Formación Continuada de las Profesiones Sanitarias. Instrucciones y Normas de Tramitación de las Solicitudes de Acreditación de Actividades de Formación Continuada de las Profesiones Sanitarias en la Comunidad de Madrid [Internet]. 2017 [cited 2019 Sep 17];Available from: http://www.madrid.org/cs/Satellite?blobcol=urldata&blobheader=application%2Fpdf&blobheadername1=Content-Disposition&blobheadervalue1=filename%3DINSTRUCCIONES+PROVEEDOR+JUNIO+2017.pdf&blobkey=id&blobtable=MungoBlobs&blobwhere=1352939843021&ssbinary=true

9. Ministerio de Sanidad, Consumo y Bienestar Social. Consulta Interactiva del SNS. Sistema de Información de Atención Primaria (SIAP). Profesionales 2018 [Internet]. 2020 [cited 2020 Oct 1];Available from: https://pestadistico.inteligenciadegestion.mscbs.es/publicoSNS/N/sistema-de-informacion-de-atencion-primaria-siap/profesionales

10. Sociedad Española de Neumología y Cirugía Torácica. Documento sobre los criterios a seguir para la concesión de Avales Institucionales, y de Reconocimiento por la Sociedad Española de Neumología y Cirugía Torácica (SEPAR) [Internet]. 2020;Available from: https://www.separ.es/node/1296

11. Sociedad Española de Médicos de Atención Primaria. Manual de procedimientos [Internet]. 2014 [cited 2020 Jun 17];Available from: https://www.semergen.es/resources/files/manualProcedimientos/manual_cvn_2014.pdf

12. Soriano JB, Alfageme I, Miravitlles M, de Lucas P, Soler-Cataluña JJ, García-Río F, et al. Prevalence and Determinants of COPD in Spain: EPISCAN II. Archivos de Bronconeumología [Internet] 2020 [cited 2020 Oct 13];Available from: http://www.sciencedirect.com/science/article/pii/S0300289620302593

13. Instituto Nacional de Estadística. Estadística del Padrón Continuo. Datos provisionales a 1 de enero de 2020. Población por edad (año a año), Españoles/Extranjeros y sexo. [Internet]. INE2020 [cited 2020 Sep 14];Available from: https://ine.es/jaxi/Datos.htm?path=/t20/e245/p04/provi/l0/&file=00000002.px#!tabs-tabla

14. Miravitlles M, Soriano JB, Garcia-Rio F, Munoz L, Duran-Tauleria E, Sanchez G, et al. Prevalence of COPD in Spain: impact of undiagnosed COPD on quality of life and daily life activities. Thorax 2009;64(10):863–8.

15. Subdirección General de Información Sanitaria y Evaluación. Dirección General de Salud Pública, Calidad e Innovación. Estadística de Centros Sanitarios de Atención Especializada. Hospitales y Centros sin Internamiento. Año 2018 [Internet]. Madrid: Ministerio de Sanidad; 2020 [cited 2020 Sep 21]. Available from: https://www.mscbs.gob.es/estadEstudios/estadisticas/docs/TablasSIAE2018/Informe_completo.pdf

16. Ministerio de Sanidad, Consumo y Bienestar Social. Consulta Interactiva del SNS. Base de Datos de Clínicos de Atención Primaria (BDCAP). Visitas 2017 [Internet]. 2020 [cited 2020 Oct 1];Available from: https://pestadistico.inteligenciadegestion.mscbs.es/publicoSNS/C/base-de-datos-de-clinicos-de-atencion-primaria-bdcap/visitas

17. Mediana de las tarifas sanitarias oficiales de las comunidades autónomas. 2019;

18. Roberts CM, Hartl S, López-Campos JL. An international comparison of COPD care in Europe. Results of the first European COPD Audit. Switzerland: European Respiratory Society; 2012.

19. Abellán García A, Aceituno Nieto M del P, Ramiro Fariñas D. Estadísticas sobre residencias: distribución de centros y plazas residenciales por provincia. Datos de abril de 2019 [Internet]. Madrid: 2019 [cited 2020 Nov 12]. Available from: http://envejecimiento.csic.es/documentos/documentos/enred-estadisticasresidencias2019.pdf

20. Máster en Enfermería en el Servicio de Neumología [Internet]. [cited 2020 Nov 6];Available from: https://www.techtitute.com/enfermeria/master/master-enfermeria-servicio-neumologia

21. Merino M, Villoro R, Hidalgo-Vega Á, Carmona C. Social economic costs of COPD in Extremadura (Spain): an observational study. Int J Chron Obstruct Pulmon Dis 2018;13:2501–14.

22. Sociedad Española de Informática de la Salud. Índice SEIS 2019 [Internet]. 2020 [cited 2020 Jun 10]. Available from: https://seis.es/indice-2019/

23. Sicras A, Huerta A, Navarro R, Ibañez J. Uso de recursos y costes asociados a las exacerbaciones de enfermedad pulmonar obstructiva crónica: estudio retrospectivo de base poblacional. SEMERGEN - Medicina de Familia 2014;40(4):189–97.

24. Pozo-Rodríguez F, López-Campos JL, Álvarez-Martínez CJ, Castro-Acosta A, Agüero R, Hueto J, et al. Clinical Audit of COPD Patients Requiring Hospital Admissions in Spain: AUDIPOC Study. PLOS ONE 2012;7(7):e42156.

25. Martín MC, León C, Cuñat J, del Nogal F. Intensive Care Services resources in Spain. Med Intensiva 2013;37(7):443–51.

26. Heili-Frades S, Carballosa de Miguel M del P, Naya Prieto A, Galdeano Lozano M, Mate García X, Mahillo Fernández I, et al. Análisis de costes y mortalidad de una unidad de cuidados intermedios respiratorios. ¿Es realmente eficiente y segura? Arch Bronconeumol 2019;55(12):634–41.

27. Ministerio de Sanidad, Consumo y Bienestar Social. Consulta Interactiva del SNS. Registro de Actividad de Atención Especializada (RAE-CMBD). Desde 2016 en adelante. Diagnósticos Principales. CIE 10: J40-J44; Pertenencia SNS: Públicos-SNS; Tipo Contacto: Hospitalización. Número de contactos. [Internet]. Portal Estadístico2020 [cited 2020 Sep 21];Available from: https://pestadistico.inteligenciadegestion.mscbs.es/publicoSNS/Comun/Cubo.aspx?IdNodo=23611

28. Saldaña Pérez LE, Hernández Sánchez MV, Herrero Domínguez-Berrueta MC, Sanz Márquez S, Pérez Encinas M, Steen B. Programa de conciliación entre neumología y farmacia como herramienta en la atención al paciente. Rev patol respir 2015;91–6.

29. Instituto Nacional de Estadística. Encuesta Nacional de Salud 2017. Cuestionario de Adultos [Internet]. 2017 [cited 2017 Oct 30];Available from: https://www.mscbs.gob.es/estadisticas/microdatos.do

30. Trapero‐Bertran M, Muñoz C, Coyle K, Coyle D, Lester‐George A, Leidl R, et al. Cost‐effectiveness of alternative smoking cessation scenarios in Spain: results from the EQUIPTMOD. Addiction 2018;113(Suppl 1):65–75.

31. Soriano ER, Dellepiane A, Salvatierra G, Benítez CA, Salinas RG, Baruzzo C. Certolizumab pegol in a heterogeneous population of patients with moderate-to-severe rheumatoid arthritis. Future Sci OA 2018;4(4):FSO289.

32. Arias-Casais N, Garralda E, Rhee JY, de Lima L, Pons JJ, Clark D, et al. EAPC atlas of palliative care in Europe 2019 [Internet]. Vilvoorde: EAPC Press; 2019. Available from: http://hdl.handle.net/10171/56787

33. Oriol I. Informe de la Situación Actual en Cuidados Paliativos [Internet]. 2014. Available from: http://www.caib.es/sacmicrofront/archivopub.do?ctrl=MCRST3145ZI178957&id=178957

34. Doblado Valderrama R, Herrera Molina E, Librada Flores S, Lucas Díaz MÁ, Muñoz Mayorga I, Rodríguez Álvarez-Ossorio Z. Directorio de Recursos de Cuidados Paliativos en España: DIRECTORIO SECPAL 2015. Madrid: Sociedad Española de Cuidados Paliativos SECPAL; 2016.

35. Ministerio de Sanidad, Consumo y Bienestar Social IN de E. Consulta Interactiva del SNS. Registro de Actividad de Atención Especializada (RAE-CMBD). Desde 2016 en adelante. Diagnósticos Principales. CIE 10: J40-J44; Pertenencia SNS: Públicos-SNS; Tipo Contacto: Hospitalización; Servicio: UCP-Unidad de Cuidados Paliativos. Estancia Media Días (Hospitalización) [Internet]. 2020 [cited 2020 Sep 21];Available from: https://pestadistico.inteligenciadegestion.mscbs.es/publicoSNS/Comun/Cubo.aspx?IdNodo=23611

36. Ramos Pollo D. Proceso Asistencial Integrado: Cuidados Paliativos de Castilla y León. 2017;

37. Fernández López A, Begara de la Fuente M, Boceta Osuna J, Camacho Pizarro T, Cía Ramos R, Duarte Rodríguez M, et al. Cuidados Paliativos: Proceso Asistencial Integrado. 2019;

38. Gainza-Miranda D. Historia natural de los pacientes con Epoc avanzada inmovilizados en domicilio [Internet]. 2019 [cited 2020 Sep 29];Available from: https://dialnet.unirioja.es/servlet/tesis?codigo=260458

39. Evans M, McEwan P, O’Shea R, George L. A retrospective, case-note survey of type 2 diabetes patients prescribed incretin-based therapies in clinical practice. Diabetes therapy: research, treatment and education of diabetes and related disorders 2013;4(1):27–40.

40. Sociedad Española de Cuidados Paliativos. Normas para solicitar el aval y utilización del logo e imagen corporativa de la Sociedad Española de Cuidados Paliativos (SECPAL) [Internet]. 2020;Available from: https://www.secpal.com/inicio

41. Grupo de trabajo para la actualización del Manual de Elaboración de GPC. Elaboración de Guías de Práctica Clínica en el Sistema Nacional de Salud. Actualización del Manual Metodológico. Madrid: Ministerio de Sanidad, Servicios Sociales e Igualdad; Zaragoza: Instituto Aragonés de Ciencias de la Salud (IACS); 2016.

42. Sociedad Española de Neumología y Cirugía Torácica. Cuotas de inscripción [Internet]. 52o CONGRESO SEPAR - Santiago de Compostela 20192019 [cited 2020 Oct 20];Available from: https://www.congresosepar.com/separ2019/inscripciones/cuotas

43. Sociedad Española de Neumología y Cirugía Torácica. Programa científico completo [Internet]. 52o CONGRESO SEPAR - Santiago de Compostela 20192019 [cited 2020 Oct 20];Available from: https://www.congresosepar.com/site/programme/?a=separ2019#!

44. Instituto Nacional de Estadística. INEbase. Servicios Hostelería y turismo. Encuesta de turismo de residentes. Series trimestrales. Resultados nacionales. Viajes, pernoctaciones, duración media y gasto por tipo de destino principal (acumulado 2019T4) [Internet]. INE2019 [cited 2020 Jun 12];Available from: https://www.ine.es/jaxiT3/Datos.htm?t=12427#!tabs-tabla

45. Ministerio de Sanidad, Consumo y Bienestar Social. Consulta Interactiva del SNS. Sistema de Información de Atención Primaria (SIAP). Profesionales. Modalidades Asistenciales. 2018. [Internet]. 2020 [cited 2020 Nov 1];Available from: https://pestadistico.inteligenciadegestion.mscbs.es/publicoSNS/C/sistema-de-informacion-de-atencion-primaria-siap/profesionales/modalidades-asistenciales

46. Lasmarías C, Espinosa J, Martínez-Muñoz M, Bullich I, Alburquerque E, Gómez-Batiste X. Estudio sobre necesidades formativas en cuidados paliativos para atención primaria. FEM (Ed impresa) 2013;16(3):159–65.

47. Ministerio de Sanidad, Consumo y Bienestar Social. Consulta Interactiva del SNS. Sistema de Información de Atención Especializada (SIAE). Hospitales. Personal y Formación. Areas Profesionales y Especialidades. 2018. [Internet]. 2020 [cited 2020 Nov 1];Available from: https://pestadistico.inteligenciadegestion.mscbs.es/publicoSNS/C/siae/siae/hospitales/personal-y-formacion/areas-profesionales-y-especialidades

48. Sobradillo Ecenarro P, Inchausti Iguiñiz M, Pedrero Tejada S, Marina Malanda N, Alfonso Imizcoz M, Ansola Marlasca L, et al. Management of COPD in End-of-Life Care by Spanish Pulmonologists. COPD: Journal of Chronic Obstructive Pulmonary Disease 2018;15(2):171–6.

49. Piera Orts A. Análisis de los costes de cursos de formación continua y continuada en un departamento de salud. Educación Médica 2018;19:192–7.

50. Ministerio de Sanidad, Consumo y Bienestar Social. Consulta Interactiva del SNS. Base de Datos de Clínicos de Atención Primaria (BDCAP). Interconsultas 2017 [Internet]. 2020 [cited 2020 Sep 22];Available from: https://pestadistico.inteligenciadegestion.mscbs.es/publicoSNS/Comun/Cubo.aspx?IdNodo=22127

51. Carr R, Telford V, Waters G. Impact of an educational intervention on the quality of spirometry performance in a general practice: an audit. Primary Care Respiratory Journal 2011;20(2):210–3.

52. Barrecheguren M, Monteagudo M, Ferrer J, Borrell E, Llor C, Esquinas C, et al. Treatment patterns in COPD patients newly diagnosed in primary care. A population-based study. Respiratory Medicine 2016;111:47–53.

53. Golpe R, Díaz-Fernández M, Mengual-Macenlle N, Sanjuán-López P, Martín-Robles I, Cano-Jiménez E. Sobrediagnóstico de enfermedad pulmonar obstructiva crónica en atención primaria. Prevalencia y condicionantes. Semergen 2017;43(8):557–64.

54. Soler N, Ballester E, Martín A, Gobartt E, Miravitlles M, Torres A. Changes in management of chronic obstructive pulmonary disease (COPD) in primary care: EMMEPOC study. Respiratory Medicine 2010;104(1):67–75.

55. Instituto Nacional de Estadística. El salario de las personas con Discapacidad. Ganancia anual para los trabajadores asalariados según tengan o no discapacidad, de 45 y más años. [Internet]. INE2017 [cited 2020 Mar 12];Available from: https://www.ine.es/jaxi/Datos.htm?path=/t22/p331/serie_anual/l0/&file=01001.px#!tabs-tabla

56. BOE Num 312. España. Real Decreto 1462/2018, de 21 de diciembre, por el que se fija el salario mínimo interprofesional para 2019. BOE núm. 312, de 27 de diciembre de 2018. 2019;5.

57. Izquierdo‐Alonso DJL, Miguel‐Díez J de. Economic Impact of Pulmonary Drugs on Direct Costs of Stable Chronic Obstructive Pulmonary Disease. COPD: Journal of Chronic Obstructive Pulmonary Disease 2004;1(2):215–23.

58. Ulrik CS, Hansen EF, Jensen MS, Rasmussen FV, Dollerup J, Hansen G, et al. Management of COPD in general practice in Denmark–participating in an educational program substantially improves adherence to guidelines. International journal of chronic obstructive pulmonary disease 2010;5:73—79.

59. de Miguel-Díez J, Carrasco-Garrido P, Rejas-Gutierrez J, Martín-Centeno A, Gobartt-Vázquez E, Hernandez-Barrera V, et al. Inappropriate overuse of inhaled corticosteroids for COPD patients: impact on health costs and health status. Lung 2011;189(3):199–206.

60. Abadias Medrano MJ, Yuguero Torres O, Bardés Robles I, Casas-Méndez LF, Barbé F, de Batlle J. Exacerbations of chronic obstructive pulmonary disease. Medicine (Baltimore) [Internet] 2018 [cited 2020 Sep 3];97(31). Available from: https://www.ncbi.nlm.nih.gov/pmc/articles/PMC6081059/

61. APEPOC - Asociación de Pacientes con EPOC S. Cuota anual [Internet]. APEPOC - Asociación de Pacientes con EPOC2020 [cited 2020 Sep 23];Available from: https://www.apepoc.es/hazte-socio

62. Puente-Maestu L, Calle M, Rodríguez-Hermosa JL, Campuzano A, de Miguel Díez J, Álvarez-Sala JL, et al. Health literacy and health outcomes in chronic obstructive pulmonary disease. Respir Med 2016;115:78–82.

63. Instituto para el Desarrollo e Integración de la Sanidad. Sanidad privada, aportando valor. Análisis de Situación 2019 [Internet]. 2019 [cited 2020 Jun 10];Available from: https://www.fundacionidis.com/informes/analisis-de-situacion-de-la-sanidad-privada

64. Ministerio de Sanidad, Consumo y Bienestar Social. Barómetro Sanitario 2018 [Internet]. 2018 [cited 2019 Mar 11]. Available from: https://www.actasanitaria.com/wp-content/uploads/2019/03/BS2018_mar.pdf

65. Romero-Ventosa EY, Gayoso-Rey M, Samartín-Ucha M, Lamas-Domínguez P, Rubianes-González M, Rodríguez-Lorenzo D, et al. Pharmacotherapeutic reports as tools for detecting discrepancies in continuity of care. Ther Innov Regul Sci 2018;52(1):94–9.

66. SEFAC. Plan de Adherencia al Tratamiento. Uso responsable del medicamento. 2016;116.

67. Instituto Nacional de Estadística. Índice de Precios de Consumo. Base 2016. Medias anuales [Internet]. 2018 [cited 2018 Jan 23];Available from: http://www.ine.es/dynt3/inebase/index.htm?padre=3502

68. de Miguel Díez J, Jiménez García R, Hernández Barrera V, Puente Maestu L, del Cura González MI, Méndez Bailón M, et al. Trends in Self-Rated Health Status and Health Services Use in COPD Patients (2006–2012). A Spanish Population-Based Survey. Lung 2015;193(1):53–62.

69. Fan L, Hou X-Y, Zhao J, Sun J, Dingle K, Purtill R, et al. Hospital in the Nursing Home program reduces emergency department presentations and hospital admissions from residential aged care facilities in Queensland, Australia: a quasi-experimental study. BMC Health Services Research 2016;16(1):46.

70. Soto-Gordoa M, de Manuel E, Fullaondo A, Merino M, Arrospide A, Igartua JI, et al. Impact of stratification on the effectiveness of a comprehensive patient-centered strategy for multimorbid patients. Health Serv Res 2019;54(2):466–73.

71. Monteagudo M, Rodriguez-Blanco T, Llagostera M, Valero C, Bayona X, Granollers S, et al. Effect of health professional education on outcomes of chronic obstructive pulmonary disease in primary care: a non-randomized clinical trial. Respirology 2013;18(4):718–27.

72. Gallefoss F. The effects of patient education in COPD in a 1-year follow-up randomised, controlled trial. Patient Education and Counseling 2004;52(3):259–66.

73. Bujalance-Zafra MJ, Domínguez-Santaella M, Baca-Osorio A, Ginel-Mendoza L, Fernández-Vargas FJ, Poyato-Ramos R. Análisis de una intervención para la mejora de resultados en salud en EPOC agudizada en atención primaria. Atención Primaria 2017;49(2):102–10.

74. Trapero‐Bertran M, Leidl R, Muñoz C, Kulchaitanaroaj P, Coyle K, Präger M, et al. Estimates of costs for modelling return on investment from smoking cessation interventions. Addiction 2018;113(Suppl Suppl 1):32–41.

75. Sicras-Mainar A, Rejas-Gutiérrez J, Navarro-Artieda R, Ibáñez-Nolla J. The effect of quitting smoking on costs and healthcare utilization in patients with chronic obstructive pulmonary disease: a comparison of current smokers versus ex-smokers in routine clinical practice. Lung 2014;192(4):505–18.

76. Ortega Eslava A, Marín Gil R, Fraga Fuentes MD, López-Briz E, Puigventós Latorre F. Guía de evaluación económica e impacto presupuestario en los informes de evaluación de medicamentos [Internet]. SEFH. Sociedad Española de Farmacia Hospitalaria; 2016 [cited 2019 Mar 18]. Available from: https://gruposdetrabajo.sefh.es/genesis/genesis/Documents/GUIA_EE_IP_GENESIS-SEFH_19_01_2017.pdf

77. Solinís RN, Hasson N, Idoiaga GE, Molina EH, Flores SL, Carolina R. Impact of a home-based social program in end of life care in the Basque Country: SAIATU Program. In: International Journal of Integrated Care. Brussels: 2014. page 165–6.

78. Ministerio de Sanidad, Consumo y Bienestar Social. Consulta Interactiva del SNS. Registro de Actividad de Atención Especializada (RAE-CMBD). Desde 2016 en adelante. Diagnósticos Principales. CIE 10: J40-J44; Pertenencia SNS: Públicos-SNS; Tipo Contacto: Hospitalización. Coste Medio APR. [Internet]. Portal Estadístico2020 [cited 2020 Oct 6];Available from: https://pestadistico.inteligenciadegestion.mscbs.es/publicoSNS/C/rae-cmbd/rae-cmbd/diagnosticos-principales/diagnosticos-principales

79. Ministerio de Sanidad, Consumo y Bienestar Social. Consulta Interactiva del SNS. Registro de Actividad de Atención Especializada (RAE-CMBD). Desde 2016 en adelante. Diagnósticos Principales. CIE 10: J40-J44; Pertenencia SNS: Públicos-SNS; Tipo Contacto: Hospitalización a Domicilio. Número de contactos. [Internet]. 2020 [cited 2020 Nov 19];Available from: https://pestadistico.inteligenciadegestion.mscbs.es/publicoSNS/C/rae-cmbd/rae-cmbd/diagnosticos-principales/diagnosticos-principales

80. Millas Ros J, Hasson N, Aguiló Pérez M, Lasagabaster Orobengoa I, Muro Gorostegui E, Romero Iturralde O. Programa de atención social domiciliaria sobre la atención a los cuidados paliativos en el País Vasco. Experiencia Saiatu. Medicina Paliativa 2015;22(1):3–11.

81. De Roo ML, Miccinesi G, Onwuteaka-Philipsen BD, Van Den Noortgate N, Van den Block L, Bonacchi A, et al. Actual and Preferred Place of Death of Home-Dwelling Patients in Four European Countries: Making Sense of Quality Indicators. PLoS ONE 2014;9(4):e93762.

82. Generalitat de Catalunya. Estudi sobre l’activitat i organització dels serveis d’urgències hospitalaris: informe final [Internet]. Barcelona: Department de Salut; 2008 [cited 2020 Oct 13]. Available from: https://scientiasalut.gencat.cat/bitstream/handle/11351/3489/Estudi_sobre_activitat_i_organitzacio_dels_serveis_urgencies_hospitalaris_2008.pdf?sequence=1

83. Houben CHM, Spruit MA, Luyten H, Pennings H-J, van den Boogaart VEM, Creemers JPHM, et al. Cluster-randomised trial of a nurse-led advance care planning session in patients with COPD and their loved ones. Thorax 2019;74(4):328–36.

84. Miravitlles M, Calle M, Molina J, Almagro P, Gómez J, Trigueros J, et al. Actualización 2021 de la Guía Española de la EPOC (GesEPOC). Tratamiento farmacológico de la EPOC estable. Archivos de Bronconeumología 2021;In press.

85. Consejo General de Colegios Oficiales de Farmacéuticos. Bot Plus 2.0 Base de Datos de Medicamentos [Internet]. Available from: https://botplusweb.portalfarma.com/botplus.aspx

1. Data within scenarios are in line with those in assumption 16 (Cost / smoker per pharmacological intervention to quit smoking), with a correspondence between each cost and each success rate. [↑](#footnote-ref-1)
2. Data within best- and worst-case scenarios in assumption 22 (Percentage of patients with indication for PalC classified as "not complex") and assumption 23 (Percentage of patients with indication for PalC classified as "complex" or "very complex") are complementary. [↑](#footnote-ref-2)
3. Data within best- and worst-case scenarios in assumption 22 (Percentage of patients with indication for PalC classified as "not complex") and assumption 23 (Percentage of patients with indication for PalC classified as "complex" or "very complex") are complementary. [↑](#footnote-ref-3)
